1 **The sleep gene *insomniac* ubiquitinates targets at postsynaptic densities and is required**  
2 **for retrograde homeostatic signaling**

3

4 Koto Kikuma<sup>1</sup>, Xiling Li<sup>1</sup>, Sarah Perry<sup>1</sup>, Qiuling Li<sup>2</sup>, Pragma Goel<sup>1</sup>, Catherine Chen<sup>1</sup>, Daniel Kim<sup>1</sup>,  
5 Nicholas Stavropoulos<sup>2</sup>, and Dion Dickman<sup>1,\*</sup>

6

7 <sup>1</sup>Department of Neurobiology, University of Southern California, Los Angeles, CA, USA

8 <sup>2</sup>Neuroscience Institute, Department of Neuroscience and Physiology, NYU School of Medicine,  
9 New York, NY, USA

10

11 Keywords: Retrograde signaling, synaptic plasticity, homeostasis, *Drosophila*, neuromuscular  
12 junction

13

14 Running title: Insomniac stabilizes synaptic strength

15

16 \*Correspondence:

17 Dion Dickman

18 Department of Neurobiology

19 University of Southern California

20 Los Angeles, CA 90089, USA

21 dickman@usc.edu

22

23

24

25

26

27 **ABSTRACT**

28 The nervous system confronts challenges during development and experience that can  
29 destabilize information processing. To adapt to these perturbations, synapses homeostatically  
30 adjust synaptic strength, a process referred to as homeostatic synaptic plasticity. At the  
31 *Drosophila* neuromuscular junction, inhibition of postsynaptic glutamate receptors activates  
32 retrograde signaling that precisely increases presynaptic neurotransmitter release to restore  
33 baseline synaptic strength. However, the nature of the underlying postsynaptic induction  
34 process remains enigmatic. Here, we designed a forward genetic screen to identify factors  
35 necessary in the postsynaptic compartment to generate retrograde homeostatic signaling. This  
36 approach identified *insomniac (inc)*, a gene that encodes a putative adaptor for the Cullin-3  
37 ubiquitin ligase complex and is essential for normal sleep regulation. Intriguingly, we find that  
38 Inc rapidly traffics to postsynaptic densities and is required for increased ubiquitination following  
39 acute receptor inhibition. Our study suggests that Inc-dependent ubiquitination,  
40 compartmentalized at postsynaptic densities, gates retrograde signaling and provides an  
41 intriguing molecular link between the control of sleep behavior and homeostatic plasticity at  
42 synapses.

43

## 44 INTRODUCTION

45 To maintain stable synaptic activity in the face of stress during development, experience, and  
46 disease, the nervous system is endowed with robust forms of adaptive plasticity that  
47 homeostatically adjust synaptic strength (Davis and Muller, 2015; Pozo and Goda, 2010;  
48 Turrigiano, 2012). The homeostatic control of synaptic plasticity is conserved from invertebrates  
49 to humans (Davis, 2013; Frank, 2014; Marder and Goaillard, 2006), and dysfunction in this  
50 process is linked to complex neural diseases including Parkinson's, schizophrenia, Fragile X  
51 Syndrome, and autism spectrum disorder (Bourgeron, 2009; Li et al., 2018a; Ramocki and  
52 Zoghbi, 2008; Soukup et al., 2018; Wondolowski and Dickman, 2013). Homeostatic adaptations  
53 at synapses are expressed through coordinated modulations in the efficacy of presynaptic  
54 neurotransmitter release and/or postsynaptic receptor abundance (Burrone and Murthy, 2003;  
55 Davis, 2006; Herring and Nicoll, 2016; Malinow, 2003; Perez-Otano and Ehlers, 2005; Shepherd  
56 and Huganir, 2007; Turrigiano, 2008; Turrigiano and Nelson, 2004). Although it is apparent that  
57 a dialogue involving both anterograde and retrograde trans-synaptic signaling serves to initiate,  
58 maintain, and integrate the homeostatic tuning of synaptic strength, the molecular nature of this  
59 communication is largely unknown.

60 The *Drosophila* neuromuscular junction (NMJ) is an established model system to  
61 interrogate the genes and mechanisms that mediate the homeostatic stabilization of synaptic  
62 strength. At this glutamatergic synapse, genetic loss or pharmacological inhibition of  
63 postsynaptic receptors initiates a retrograde signaling system that instructs a compensatory  
64 increase in presynaptic neurotransmitter release to restore baseline levels of synaptic strength  
65 (Frank et al., 2006; Petersen et al., 1997), a process referred to as presynaptic homeostatic  
66 potentiation (PHP). Forward genetic screens in this system have proven to be a powerful tool to  
67 identify genes necessary for the expression of PHP (Dickman and Davis, 2009; Frank, 2014;  
68 Muller et al., 2011). Work over the past decade has revealed that a rapid increase in both  
69 presynaptic Ca<sup>2+</sup> influx and the size of the readily releasable vesicle pool are necessary to

70 homeostatically enhance neurotransmitter release during PHP (Kiragasi et al., 2017; Li et al.,  
71 2018c; Muller and Davis, 2012; Weyhersmuller et al., 2011). Furthermore, candidate molecules  
72 involved in retrograde signaling have been proposed (Orr et al., 2017; Wang et al., 2014).  
73 However, despite these significant insights, forward genetic screens have failed to shed light on  
74 the postsynaptic mechanisms that induce retrograde signaling, a process that remains  
75 enigmatic (Chen and Dickman, 2017; Goel et al., 2017; Hauswirth et al., 2018).

76 Little is known about the signal transduction system in the postsynaptic compartment  
77 that initiates retrograde homeostatic communication. It is clear that pharmacological blockade or  
78 genetic loss of GluRIIA-containing receptors initiates retrograde PHP signaling. Perturbation of  
79 these receptors lead to reduced levels of active (phosphorylated) Ca<sup>2+</sup>/calmodulin-dependent  
80 protein kinase II (CaMKII) (Goel et al., 2017; Haghghi et al., 2003; Li et al., 2018c; Newman et  
81 al., 2017). However, inhibition of postsynaptic CaMKII activity alone is not sufficient to induce  
82 PHP expression (Haghghi et al., 2003), suggesting that additional signaling in the postsynaptic  
83 compartment is required to generate retrograde communication. Furthermore, rapid PHP  
84 signaling induced by pharmacological receptor blockade does not require new protein synthesis  
85 (Frank et al., 2006; Goel et al., 2017). Finally, CaMKII signaling is compartmentalized at  
86 postsynaptic densities, where PHP can be expressed with specificity at synapses with  
87 diminished receptor function (Li et al., 2018b; Newman et al., 2017), suggesting that retrograde  
88 communication happens locally between individual pre- and post-synaptic dyads. Although a  
89 role for postsynaptic PI3- $\alpha$  kinase in PHP was recently proposed (Hauswirth et al., 2018), it is  
90 unclear how this signaling is connected to localized glutamate receptor perturbation,  
91 compartmentalized changes in CaMKII activity, or retrograde communication to specific  
92 presynaptic release sites. Together, these data suggest that translation-independent signaling  
93 systems are compartmentalized at postsynaptic densities and function in addition to CaMKII to  
94 ultimately drive localized retrograde homeostatic communication to specific presynaptic release  
95 sites.

96 To gain insight into the mechanisms underlying PHP induction, we have designed  
97 complementary forward genetic screens to identify genes that specifically function in the  
98 postsynaptic compartment to enable retrograde homeostatic signaling. This approach  
99 discovered a single gene, *insomniac (inc)*, that functions in the postsynaptic muscle to induce  
100 retrograde communication following postsynaptic glutamate receptor perturbation. *inc* encodes  
101 a putative adaptor for the Cullin-3 (Cul3) E3 ubiquitin ligase complex that targets substrates for  
102 ubiquitination and is necessary for normal sleep behavior (Pfeiffenberger and Allada, 2012;  
103 Stavropoulos and Young, 2011). Our findings suggest that rapid and compartmentalized  
104 ubiquitination at postsynaptic densities is a key inductive event during trans-synaptic  
105 homeostatic signaling.

106

## 107 **RESULTS**

### 108 **Electrophysiology-based forward genetic screens identify *inc***

109 We first generated a list of ~800 neural and synaptic genes to screen for defects in the ability to  
110 express PHP. A substantial portion of these genes were gleaned from various studies linking  
111 genes to schizophrenia, intellectual disability, autism, and Fragile X Syndrome (see Methods for  
112 more details). We hypothesized that these genes and targets of the Fragile X Mental  
113 Retardation Protein (FMRP) might provide a rich source to assess for postsynaptic roles in  
114 homeostatic synaptic signaling. First, previous studies have established intriguing links between  
115 homeostatic plasticity and complex neurological and neuropsychiatric diseases (Ramocki and  
116 Zoghbi, 2008; Wondolowski and Dickman, 2013). Second, FMRP itself has important roles at  
117 postsynaptic densities (Muddashetty et al., 2007; Schutt et al., 2009; Tsai et al., 2012) and has  
118 been implicated in homeostatic signaling at mammalian synapses (Henry, 2011; Lee et al.,  
119 2018; Soden and Chen, 2010; Zhang et al., 2018). We established a list of *Drosophila* genes  
120 that are homologs of the ~800 genes from the initial gene list (see Methods and Supplementary

121 Table 1), and obtained 134 genetic mutants and 284 RNAi lines in *Drosophila* representing  
122 these genes to screen for potential defects in PHP expression (Fig. 1a, d).

123 We used two distinct ways to screen mutants and RNAi lines for their effects on PHP  
124 expression. To screen the 134 mutants, we used an established screening approach that  
125 utilizes a rapid pharmacological assay to assess PHP (Dickman and Davis, 2009; Muller et al.,  
126 2011). In this assay, application of the postsynaptic glutamate receptor antagonist  
127 philanthotoxin (PhTx) inhibits miniature neurotransmission, but synaptic strength (evoked  
128 EPSPs) remains similar to baseline values because of a homeostatic increase in presynaptic  
129 neurotransmitter release (quantal content). For each mutant, we quantified synaptic strength  
130 following 10 min incubation in PhTx (Fig. 1b). This led to the identification of twelve potential  
131 PHP mutants with significantly reduced synaptic strength after PhTx application, indicative of  
132 either reduced baseline transmission or a failure to express PHP. Next, baseline transmission  
133 was assessed in these mutants by recording in the absence of PhTx; six mutants with reduced  
134 baseline neurotransmission were identified and not studied further (Supplementary Table 2).  
135 The remaining six mutants represent genes necessary to express PHP (Fig. 1a, b), including  
136 the active zone component *fife*, which was recently shown to be necessary for PHP expression  
137 (Bruckner et al., 2017).

138 In parallel, we assessed PHP in the 284 RNAi lines using an established stock that  
139 drives the RNAi transgene in both neurons and muscle. Importantly, postsynaptic glutamate  
140 receptor expression is also reduced in this stock through RNAi-mediated knock-down of the  
141 GluRIII receptor transcript (Brusich et al., 2015). After crossing each RNAi line to this stock, we  
142 quantified electrophysiological recordings and identified 13 genes that were putatively  
143 necessary for PHP expression (Fig. 1d). To determine baseline synaptic strength in these RNAi  
144 lines, we expressed each in neurons and muscle in the absence of GluRIII knock down. Of  
145 these thirteen genes, eleven exhibited a significant decrease in EPSP amplitude after crossing  
146 to the control stock, suggesting reduced baseline transmission (Supplementary Table 2). In

147 contrast, two RNAi lines displayed normal baseline synaptic strength, indicating they were  
148 specifically necessary for PHP expression (Fig. 1d, e). Importantly, these two genes targeted by  
149 RNAi lines were also identified in the PhTx screen, validating this complementary screening  
150 strategy. Together, these two screens identified six genes whose requirement for PHP has not  
151 been previously described.

152 If a gene functioned in the presynaptic neuron, this would imply that it was involved in  
153 the expression of increased neurotransmitter release characteristic of PHP, while a postsynaptic  
154 function in the muscle would suggest an involvement in the induction of PHP signaling. We  
155 therefore used several strategies to determine in which synaptic compartment each gene was  
156 required for the induction or expression of PHP. For each of these six genes, we assessed  
157 RNA-seq expression profiles (Chen and Dickman, 2017), known expression patterns, genetic  
158 rescue and/or tissue-specific RNAi knockdown (Fig. 1c, f). Together, this analysis revealed five  
159 genes that function in the presynaptic neuron, and only a single gene, *insomniac* (*inc*), that  
160 functions in the postsynaptic cell (Fig. 1c, f). Given that the postsynaptic mechanisms that drive  
161 the induction of PHP are poorly defined, we focused on characterizing the role of *inc* in PHP  
162 signaling.

163

#### 164 ***inc* is required in the postsynaptic muscle to drive retrograde PHP signaling**

165 To further investigate the role of *inc* in PHP, we first generated new null alleles using  
166 CRISPR/Cas9 genome editing technology (Gratz et al., 2013a). We obtained two independent  
167 mutations in the *inc* locus causing premature stop codons (Fig. 2a), alleles we named *inc<sup>kk3</sup>* and  
168 *inc<sup>kk4</sup>*. We confirmed that both alleles are protein nulls by immunoblot analysis with an anti-*Inc*  
169 antibody (Fig. 2b). Furthermore, behavioral analysis demonstrated that both *inc<sup>kk</sup>* mutants  
170 exhibit severely shortened sleep, similar to previously described *inc* null alleles (Supplementary  
171 Fig. 1 and (Stavropoulos and Young, 2011)).

172           Next, we characterized synaptic physiology in *inc* mutants using two-electrode voltage  
173 clamp recordings. We first confirmed that baseline synaptic transmission was largely  
174 unperturbed by the loss of *inc* (Fig. 2c and Supplementary Fig. 1). However, while PhTx  
175 application reduced mEPSC amplitudes in both wild type and *inc* mutants, no homeostatic  
176 increase in presynaptic release was observed in *inc* mutants, resulting in reduced EPSC  
177 amplitude (Fig. 2c, d). Similar results were found for *inc<sup>kk3</sup>/inc<sup>Df</sup>* and *inc<sup>kk4</sup>* mutants (Fig. 2d and  
178 Supplementary Table 3). In addition, *inc* mutants failed to express PHP over chronic time scales  
179 when combined with *GluRIIA* mutations (Supplementary Fig. 2). Thus, *inc* is necessary for the  
180 expression of PHP over both acute and chronic time scales.

181           If *inc* were required in the neuron for PHP expression, this would indicate a function in  
182 augmenting presynaptic neurotransmitter release. In contrast, if *inc* were required in the muscle,  
183 this would suggest a role in postsynaptic retrograde communication. We therefore determined in  
184 which synaptic compartment *inc* is required for PHP expression. First, we used an *inc-Gal4*  
185 transgene (Stavropoulos and Young, 2011) to express a GFP reporter and observed the GFP  
186 signal in both presynaptic motor neurons and the postsynaptic musculature (Fig. 2e), as  
187 previously described (Li et al., 2017). To determine in which compartment *inc* expression was  
188 required for PHP, we performed a tissue-specific rescue experiment using a UAS transgene  
189 expressing Inc fused to a *spaghetti monster* Fluorescent Protein (smFP) 10xFlag tag ((*UAS-*  
190 *smFP-inc*; (Viswanathan et al., 2015)). Consistent with the notion that smFP-Inc does not  
191 antagonize endogenous Inc, overexpression of this transgene had no impact on baseline  
192 synaptic transmission or PHP expression (Supplementary Fig. 3). Expression of this transgene  
193 with *inc-Gal4* also rescued the sleep deficits in *inc* mutants (Supplementary Fig. 1), suggesting  
194 that *smFP-inc* recapitulates Inc function. Importantly, PHP expression was fully restored in *inc*  
195 mutants when this transgene was expressed specifically in the postsynaptic muscle, but not  
196 when expressed in the presynaptic neuron (Fig. 2f, g). These experiments indicate that *inc*  
197 function in the postsynaptic muscle is sufficient to enable retrograde PHP signaling.



198

199 **Inc functions downstream of CaMKII or in a parallel pathway to generate retrograde PHP**  
200 **signaling**

201 To characterize the postsynaptic functions of *inc* that enable PHP signaling, we sought to define  
202 at what point *inc* is required in this process. First, we assessed whether *inc* mutants exhibit  
203 alterations in the localization or abundance of postsynaptic glutamate receptors, key  
204 components that initiate PHP signaling. However, we found no significant difference in  
205 glutamate receptor puncta signal intensity or localization (Fig. 3a, b).

206 Next, we examined the compartmentalized reduction in CaMKII activity, thought to be a  
207 key inductive event during retrograde PHP signaling. Indeed, postsynaptic expression of a  
208 constitutively active form of CaMKII occludes PHP expression (Haghighi et al., 2003; Li et al.,  
209 2018b), and reduced pCaMKII immunofluorescence intensity at the postsynaptic density is  
210 observed following loss or pharmacological blockade of glutamate receptors (Goel et al., 2017;  
211 Li et al., 2018b; Newman et al., 2017). Further, because the ubiquitination of Inc substrates  
212 could trigger their proteolysis, we considered whether Inc might degrade CaMKII following  
213 glutamate receptor perturbation. If so, *inc* mutants might fail to reduce pCaMKII abundance at  
214 postsynaptic densities following PhTx application, a process thought to be necessary to enable  
215 retrograde PHP signaling (Haghighi et al., 2003; Li et al., 2018b). However, pCaMKII levels  
216 were similar at the NMJs of *inc* mutants and wild type controls in baseline conditions, and were  
217 also reduced to similar levels following PhTx application (Fig. 3c, d).

218 Finally, retrograde signaling from the postsynaptic compartment following PHP induction  
219 leads to remodeling of the presynaptic active zone scaffold bruchpilot ((BRP; (Goel et al., 2017;  
220 Weyhersmuller et al., 2011)). We therefore determined whether BRP is remodeled in *inc*  
221 mutants following PhTx application. As expected, BRP puncta intensity rapidly increased at  
222 presynaptic terminals following PhTx application at wild-type NMJs. However, no change in  
223 BRP puncta levels was observed in *inc* mutants following PhTx application (Fig. 3c, d).

224 Together, these results demonstrate that *inc* functions downstream of or in parallel to CaMKII in  
225 the postsynaptic compartment, where it is necessary for the retrograde homeostatic signaling  
226 that adaptively modulates presynaptic structure and neurotransmitter release (schematized in  
227 Fig. 3e).

228

229 **Endogenously tagged Inc is rapidly transported to postsynaptic densities following**  
230 **glutamate receptor perturbation.**

231 *inc* encodes a highly conserved protein with homology to the Bric-à-brac, Tramtrack,  
232 and Broad/Pox virus zinc finger (BTB/POZ) superfamily, which includes adaptors for the Cul3  
233 E3 ubiquitin ligase complex. Inc physically interacts with Cul3, and Cul3 is similarly required for  
234 normal sleep, implicating Inc as a substrate adaptor for the Cul3 complex (Pfeiffenberger and  
235 Allada, 2012; Stavropoulos and Young, 2011). Consistent with such a mechanism, we observed  
236 that knock-down of *Cul3* in muscle, but not in neurons, disrupted the expression of PHP after  
237 PhTx application (Supplementary Fig. 4), suggesting that Cul3 works with Inc in the  
238 postsynaptic compartment to drive retrograde PHP signaling. The Cul3-Inc complex might  
239 ubiquitinate substrates and cause their degradation by the proteasome. Alternatively, Cul3-Inc  
240 may regulate substrates by non-degradative mechanisms, including mono-ubiquitination  
241 (schematized in Fig. 4b), a post-translational modification that can modulate protein trafficking  
242 and signaling (Jin et al., 2012; Kobayashi et al., 2004; Lu and Pfeffer, 2014). A recent study  
243 rigorously explored the role of proteasomal degradation during PHP at the *Drosophila* NMJ  
244 (Wentzel et al., 2018). Postsynaptic PHP signaling was not impacted by acute pharmacological  
245 or chronic genetic inhibition of proteasome-mediated protein degradation (Wentzel et al., 2018).  
246 These data and our findings therefore suggest that Cul3 and Inc may mono-ubiquitinate  
247 substrates in the postsynaptic compartment to trigger rapid PHP signaling.

248 A localized reduction in active CaMKII is observed specifically at the postsynaptic  
249 density following genetic loss or pharmacological perturbation of glutamate receptors ((Goel et

250 al., 2017; Newman et al., 2017) and Fig. 3)), suggesting that the key processes driving synapse-  
251 specific retrograde PHP signaling occur in this structure(Li et al., 2018b). We therefore first  
252 determined whether Inc is present at the postsynaptic density. We endogenously tagged *inc*  
253 with an smFP tag (*inc<sup>smFP</sup>*; see Methods) and verified that this tag does not disrupt basal  
254 synaptic transmission or PHP expression (Supplementary Fig. 1 and 3). Imaging of Inc<sup>smFP</sup> at  
255 the larval NMJ revealed a low and diffuse cytosolic signal with some enrichment at postsynaptic  
256 densities (Fig. 4a). Strikingly, we found that the intensity of Inc<sup>smFP</sup> was rapidly enhanced at  
257 postsynaptic densities after perturbation of glutamate receptors using 10 min application of  
258 PhTx (Fig. 4a, c).

259 Next, we immunostained the NMJ with two anti-Ubiquitin antibodies at basal conditions  
260 and following 10 min PhTx incubation in wild type and *inc* mutants. The FK2 antibody  
261 recognizes both poly- and mono-ubiquitinated proteins (Fujimuro et al., 1994; Wentzel et al.,  
262 2018), while the FK1 antibody recognizes only poly-ubiquitinated conjugates (Fujimuro et al.,  
263 1994; Ma et al., 2016). We found that the ubiquitin signal labeled by FK2 rapidly increased at  
264 postsynaptic densities following PhTx application, while no change in the FK1 signal was  
265 observed (Fig. 4d, e). This suggests that acute glutamate receptor perturbation increases mono-  
266 ubiquitination at postsynaptic densities. However, no change in the FK2 signal was observed at  
267 postsynaptic densities in *inc* mutants following PhTx application (Fig. 4d, e), indicating that *inc* is  
268 required for the rapid and compartmentalized increase in ubiquitinated substrates following  
269 postsynaptic glutamate receptor perturbation. Thus, Inc rapidly traffics to postsynaptic densities  
270 and may locally target substrates for ubiquitination within minutes of glutamate receptor  
271 blockade during retrograde homeostatic signaling.

272

## 273 **DISCUSSION**

274 By screening more than 300 synaptic genes, we have identified *inc* as a key postsynaptic  
275 regulator of retrograde homeostatic signaling at the *Drosophila* NMJ. Our data suggest that Inc

276 is recruited to the postsynaptic density within minutes of glutamate receptor perturbation, where  
277 it promotes local ubiquitination. *inc* functions downstream of or in parallel to CaMKII and  
278 upstream of retrograde signaling during PHP. Together, our findings implicate a post-  
279 translational signaling system involving mono-ubiquitination in the induction of retrograde  
280 homeostatic signaling at postsynaptic compartments.

281         Although forward genetic screens have been very successful in identifying genes  
282 required in the presynaptic neuron for the expression of PHP, these screens have provided less  
283 insight into the postsynaptic mechanisms that induce retrograde homeostatic signaling. It seems  
284 clear that many genes acting presynaptically are individually required for PHP expression  
285 (Bruckner et al., 2017; Dickman and Davis, 2009; Dickman et al., 2012; Kiragasi et al., 2017;  
286 Muller et al., 2012; Muller et al., 2011; Tsurudome et al., 2010; Younger et al., 2013), with loss  
287 of any one completely blocking PHP expression. In contrast, forward genetic screens have  
288 largely failed to uncover new genes functioning in the postsynaptic muscle during PHP, implying  
289 some level of redundancy. The specific postsynaptic induction mechanisms driving retrograde  
290 PHP signaling have therefore remained unclear (Chen and Dickman, 2017; Goel et al., 2017),  
291 further complicated by cap-dependent translation and metabolic pathways somehow engaging  
292 with postsynaptic PHP signaling over chronic, but not acute, time scales (Kauwe et al., 2016;  
293 Penney et al., 2012; Penney et al., 2016). Therefore, it is perhaps not surprising that despite  
294 screening hundreds of mutants, we found only a single gene, *insomniac*, to be required for PHP  
295 induction. *Inc* is expressed in the nervous system and can traffic to the presynaptic terminals of  
296 motor neurons (Li et al., 2017). In the context of PHP signaling, however, we found *inc* to be  
297 required in the postsynaptic compartment, where it functions downstream of or in parallel to  
298 CaMKII. One attractive possibility is that a reduction in CaMKII-dependent phosphorylation of  
299 postsynaptic targets enables a subsequent ubiquitination by Cul3-*Inc* complexes, and that this  
300 modification ultimately drives retrograde signaling during PHP. Indeed, reciprocal influences of  
301 phosphorylation and ubiquitination on common targets are a common regulatory feature in a

302 variety of signaling systems (Haglund and Dikic, 2005; Karin and Ben-Neriah, 2000; Kawabe  
303 and Brose, 2011). This dynamic interplay of phosphorylation and ubiquitination in the  
304 postsynaptic compartment may enable a sensitive and tunable mechanism for controlling the  
305 timing and calibrating the amplitude of retrograde signaling at the NMJ.

306         The substrates targeted by Inc for ubiquitination during PHP induction are not known,  
307 but there are some candidate pathways to assess. One possibility is that Inc could regulate  
308 membrane trafficking events important for retrograde signaling. Multiplexin, a fly homolog of  
309 collagen XV/XVIII, and Semaphorin 2B, a secreted protein, were recently proposed to function  
310 in retrograde PHP signaling (Orr et al., 2017; Wang et al., 2014), as was postsynaptic  
311 endosomal trafficking through Rab11 (Hauswirth et al., 2018). While the relationship between  
312 these factors and whether and to what extent trafficking and secretion are regulated during PHP  
313 signaling are unclear, the functions of these proteins could be modulated by Cul3- and Inc-  
314 dependent ubiquitination. Interestingly, Cul3-dependent mono-ubiquitination regulates  
315 membrane trafficking in a Ca<sup>2+</sup>-dependent manner (Jin et al., 2012; McGourty et al., 2016), and  
316 Inc could plausibly modulate membrane trafficking during retrograde signal transduction.  
317 Alternatively, postsynaptic scaffolds and glutamate receptors may be key Inc substrates at the  
318 *Drosophila* NMJ, given that these proteins are targets for ubiquitin-mediated signaling and  
319 remodeling at mammalian dendritic spines (Burbea et al., 2002; Colledge et al., 2003; Foot et  
320 al., 2017; Hicke and Dunn, 2003; Lin and Man, 2013; Schwarz et al., 2010). Indeed, there is  
321 evidence that signaling complexes composed of neurotransmitter receptors, CaMKII, and  
322 membrane-associated guanylate kinases are intimately associated at postsynaptic densities in  
323 *Drosophila* (Gillespie and Hodge, 2013; Hodge et al., 2006; Lu et al., 2003), and there has been  
324 speculation that these complexes are targets for modulation during PHP signaling (Goel et al.,  
325 2017; Newman et al., 2017). Ubiquitin-mediated signaling is therefore an attractive process to  
326 mediate the translation-independent induction PHP, given the rapid and local enrichment of

327 ubiquitinated proteins triggered at postsynaptic densities following glutamate receptor  
328 perturbation and the variety of potential targets sequestered in these compartments.

329         Although it is well established that the ubiquitin proteasome system can sculpt and  
330 remodel synaptic architecture, the importance of mono-ubiquitination at synapses is less well  
331 studied. Ubiquitin-dependent pathways play key roles in synaptic structure, function, and  
332 degeneration, while also contributing to activity-dependent dendritic growth (DiAntonio et al.,  
333 2001; Ehlers, 2003; Hamilton et al., 2012; Hamilton and Zito, 2013; Tai and Schuman, 2008;  
334 Tian and Wu, 2013; Wan et al., 2000; Wang et al., 2017). However, the fact that some proteins  
335 persist for long periods at synapses suggests that any modification of these proteins by ubiquitin  
336 might be non-degradative and reversible. Indeed, a recent study revealed a remarkable  
337 heterogeneity in the stability of synaptic proteins, with some short lived and rapidly turned over,  
338 while others persist for long times scales and are extremely stable, with half lives of months or  
339 longer (Heo et al., 2018). At the *Drosophila* NMJ, rapid ubiquitin-dependent proteasomal  
340 degradation at presynaptic terminals is necessary for the expression of PHP through modulation  
341 of the synaptic vesicle pool (Wentzel et al., 2018). In contrast, postsynaptic proteasomal  
342 degradation is not required for rapid PHP signaling, suggesting that ubiquitin-dependent  
343 pathways in the postsynaptic compartment contribute to PHP signaling by non-degradative  
344 mechanisms. Our data demonstrate that Cul3 and Inc function in muscle is necessary to enable  
345 retrograde PHP signaling, and suggest that these proteins trigger rapid mono-ubiquitination at  
346 postsynaptic densities. Interestingly, synaptic proteins can be ubiquitinated in less than 15  
347 seconds following depolarization-induced Ca<sup>2+</sup> influx at synapses (Chen et al., 2003). Together,  
348 both poly- and mono-ubiquitination may function in combination with other rapid and reversible  
349 processes, including phosphorylation, at pre- and post-synaptic compartments to enable robust  
350 and diverse signaling outcomes during plasticity.

351         A prominent hypothesis postulates that a major function of sleep is to homeostatically  
352 regulate synaptic strength following experience-dependent changes that accrue during

353 wakefulness (Tononi and Cirelli, 2014; Vyazovskiy and Harris, 2013). Several studies have  
354 revealed provocative changes in neuronal firing rate and synaptic structure and during  
355 sleep/wake behavior (Bushey et al., 2011; de Vivo et al., 2017; Diering et al., 2017; Gilestro et  
356 al., 2009; Hengen et al., 2016; Li et al., 2017; Yang et al., 2014), yet few molecular mechanisms  
357 linking the electrophysiological process of homeostatic synaptic plasticity and sleep have been  
358 identified. Our finding that *inc* is required for the homeostatic control of synaptic strength  
359 provides an intriguing link to earlier studies which implicated *inc* in the regulation of sleep  
360 (Pfeiffenberger and Allada, 2012; Stavropoulos and Young, 2011). It remains to be determined  
361 whether the role of *inc* in controlling PHP signaling at the NMJ is related to the impact of *inc* on  
362 sleep and whether *Inc* targets the same substrates to regulate these processes. Virtually all  
363 neuropsychiatric disorders are associated with sleep dysfunction, including those associated  
364 with homeostatic plasticity and Fragile X Syndrome (Bushey et al., 2009; Ferrarelli et al., 2007;  
365 Kidd et al., 2014; Sare et al., 2017; Wondolowski and Dickman, 2013; Wulff et al., 2010).  
366 Interestingly, sleep behavior is also disrupted by mutations in the *Drosophila* homolog of FMRP,  
367 *dfmr1* (Bushey et al., 2009). Further investigation of this provocative network of genes involved  
368 in the homeostatic control of sleep and synaptic plasticity may help solve the biological mystery  
369 that is sleep and shed light on the etiology of neuropsychiatric diseases.

370

## 371 **MATERIALS AND METHODS**

372 **PHP genetic screen:** We identified over 700 mammalian genes that encode transcripts  
373 expressed at synapses and that have not been previously screened for PHP. This list was  
374 generated from a variety of previous studies and was enriched in putative transcripts associated  
375 with FMRP ((Ascano et al., 2012; Brown et al., 2001; Darnell et al., 2011; Gilman et al., 2011;  
376 Miyashiro et al., 2003); see Supplementary Table 1)). This list was further supplemented with an  
377 additional 176 genes associated with schizophrenia and autism spectrum disorder (Cross-  
378 Disorder Group of the Psychiatric Genomics, 2013; Gilman et al., 2011; Jurado et al., 2013;

379 Sando et al., 2012). From these initial lists of mammalian genes, we identified 352 *Drosophila*  
380 homologs. We used a combination of known genetic mutations and/or putative transposon  
381 mutations (197) or RNA-interference transgenes (341) targeting these genes to obtain a stock  
382 collection to screen. Finally, we assessed the lethal phase of homozygous mutants and RNAi  
383 lines crossed to motor neuron and muscle Gal4 drivers, removing any mutants that failed to  
384 survive to at least the third-instar larval stage. This led to a final list of 134 mutations to screen  
385 by PhTx application and 284 RNAi lines to screen by *GluRIII* knock down (Supplementary Table  
386 1). The RNAi screen was performed using T15 and C15 lines, as described (Brusich et al.,  
387 2015).

388

389 **Fly stocks:** All *Drosophila* stocks were raised at 25°C on standard molasses food. The  
390 following fly stocks were used in this study: T15 and C15 (Brusich et al., 2015); *inc*<sup>1</sup> and *inc*<sup>2</sup>  
391 (Stavropoulos and Young, 2011); *OK371-Gal4* (Mahr and Aberle, 2006); *MHC-Gal4* (Schuster  
392 et al., 1996); *UAS-Cul3 RNAi*<sup>i<sup>11861R-2</sup></sup> ((National Institute of Genetics Fly Stock Center;  
393 (Stavropoulos and Young, 2011)); *UAS-dcr2* (Dietzl et al., 2007); *inc-Gal4* (Stavropoulos and  
394 Young, 2011); *GluRIIA*<sup>SP16</sup> (Petersen et al., 1997). The *w*<sup>1118</sup> strain was used as the wild-type  
395 control unless otherwise noted because this is the genetic background in which all genotypes  
396 are bred. *Df(1)Exel8196* and *UAS-eGFP* were obtained from the Bloomington Drosophila Stock  
397 Center. See Supplementary Table 1 for sources of the screened genetic mutants and RNAi  
398 lines.

399

400 **Molecular biology:** *inc*<sup>kk</sup> mutants were generated using a CRISPR/Cas9 genome editing  
401 strategy as described (Gratz et al., 2013a; Kikuma et al., 2017). Briefly, we selected a target  
402 Cas-9 cleavage site in the first *inc* exon without obvious off-target sequences in the *Drosophila*  
403 genome (sgRNA target sequence: 5' GTTCCTCTCCCGTCTGATTC AGG 3', PAM  
404 underscored). DNA sequences containing this target sequence were synthesized and



405 subcloned into the pU6-BbsI-chiRNA plasmid ((Gratz et al., 2013a); Addgene, Cambridge, MA).  
406 To generate the sgRNA, pU6-BbsI-chiRNA was PCR amplified and cloned into the pattB vector  
407 (Bischof et al., 2007). This construct was injected and inserted into the attP40 target sequence  
408 on the second chromosome (Markstein et al., 2008) and balanced. This line was crossed into a  
409 stock expressing Cas9 under control of *vas* regulatory sequences, which led to 9 independent  
410 indels with predicted frameshift mutations in the *inc* open reading frame confirmed by PCR  
411 followed by sequencing of *inc* gene in male flies after balancing. Lines which introduced the  
412 earliest stop codon (R50Stop) and the second earliest stop codon (C57STOP) were chosen for  
413 further analyses and were named *inc<sup>kk3</sup>* and *inc<sup>kk4</sup>* respectively.

414 To generate *UAS-smFP-inc*, we subcloned the full-length *inc* cDNA from the expressed  
415 sequence tag LD43051 (Drosophila Genomics Resources Center; Bloomington, IN) into the  
416 pACU2 vector (Han et al., 2011) using standard methods. A spaghetti monster FLAG tag  
417 ((10xFLAGsmFP; (Viswanathan et al., 2015)) was PCR amplified and placed in-frame before  
418 the stop codon of the *inc* open reading frame. Constructs were sequence verified and injected  
419 into the *w<sup>1118</sup>* strain using the VK18 insertion site on the second chromosome (Venken et al.,  
420 2006) by BestGene Inc. (Chino Hill, CA). Endogenously tagged *inc<sup>smFP</sup>* was generated by Well  
421 Genetics Inc. (Taipei, Taiwan) using CRISPR/Cas9 targeting and homology directed repair  
422 (Gratz et al., 2013a; Gratz et al., 2013b). Briefly, a construct containing the smFP-10xFLAG as  
423 well as a 3xP3 DsRed reporter was inserted just before the stop codon of the endogenous *inc*  
424 locus using a single target gRNA synthesized as RNA and injected. This construct was injected  
425 into a *w<sup>1118</sup>* strain with Cas9 expression and the insertion was confirmed by DsRed<sup>+</sup> eyes; the  
426 DsRed marker was subsequently excised using the pBac transposase, leaving only smFP at the  
427 *inc* C-terminus. The insertion was confirmed by genomic PCR sequencing.

428

429 **Electrophysiology:** Electrophysiology was performed as described (Kiragasi et al., 2017).

430 Electrophysiological sweeps were digitized at 10 kHz with a 1 kHz filter. For all two-electrode

431 voltage clamp (TEVC) recordings, muscles were clamped at -70 mV, with a leak current below 5  
432 nA. mEPSCs were recorded for 1 min from each muscle cell in the absence of stimulation. 20  
433 EPSCs were acquired for each cell under stimulation at 0.5 Hz, using 0.5 msec stimulus  
434 duration and with stimulus intensity adjusted with an ISO-Flex Stimulus Isolator (A.M.P.I.). To  
435 acutely block postsynaptic receptors, larvae were incubated with or without philanthotoxin-433  
436 (PhTx; 20  $\mu$ M; Sigma) in HL-3 for 10 mins as described (Dickman and Davis, 2009; Frank et al.,  
437 2006). Data were analyzed using Clampfit 10.7 (Molecular Divices), MiniAnalysis (Synaptosoft),  
438 Excel (Microsoft), and GraphPad Prism (GraphPad Software).

439

440 **Immunocytochemistry:** Third-instar larvae were dissected in ice cold 0  $\text{Ca}^{2+}$  HL-3 and  
441 immunostained as described (Chen et al., 2017). All genotypes were immunostained in the  
442 same tube with identical reagents, and then mounted in the same session. The following  
443 antibodies were used: mouse anti-Bruchpilot (BRP; nc82; 1:100; Developmental Studies  
444 Hybridoma Bank; DSHB); mouse anti-GluRIIA (1:100; 8B4D2; DSHB); guinea pig anti-GluRIID  
445 (1:1,000; (Perry et al., 2017)); rabbit anti-DLG (1:5000; (Pielage et al., 2005)); mouse anti-DLG  
446 (1:100; 4F3; DSHB); mouse anti-FK1 (1:100; Millipore 04-262); mouse anti-FK2 (1:500; BML-  
447 PW8810; Enzo Life Sciences); mouse anti-FLAG (1:500, F1804; Sigma-Aldrich); mouse anti-  
448 pCaMKII (1:100; MA1-047; Invitrogen). Donkey anti-mouse, anti-guinea pig, and anti-rabbit  
449 Alexa Fluor 488-, DyLight 405-, and Cyanine 3 (Cy3)-conjugated secondary antibodies (Jackson  
450 Immunoresearch) were used at 1:400. Alexa Fluor 647 conjugated goat anti-HRP (Jackson  
451 ImmunoResearch) was used at 1:200.

452

453 **Western blot:** Protein extracts were prepared from male whole animals by homogenization in  
454 ice-cold NP40 lysis buffer (50mM Tris pH7.6, 150mM NaCl, 0.5% NP40) supplemented with  
455 protease inhibitors (Sigma, P8340). Protein lysates were centrifuged at 4°C at 15,000 x g for 15

456 min and quantitated in duplicate (BioRad, 5000111). 60  $\mu$ g was resolved by Tris-SDS-PAGE  
457 and transferred to nitrocellulose. Membranes were blocked for 1 hr at room temperature in LI-  
458 COR Odyssey buffer (LI-COR, 927-40000). Membranes were subsequently incubated overnight  
459 at 4 °C in blocking buffer containing 0.1% Tween 20, rat anti-Insomniac (1:1,000) (Stavropoulos  
460 and Young, 2011), and mouse anti-tubulin (1:100,000, Genetex, gtx628802). After washing 4 $\times$ 5  
461 min in TBST solution (150mM NaCl, 10mM Tris pH7.6, and 0.1% Tween20), membranes were  
462 incubated in the dark for 30 min at room temperature in blocking buffer containing 0.1% Tween  
463 20, 0.01% SDS, Alexa 680 donkey anti-rat (1:30,000, Jackson ImmunoResearch, 712-625-153),  
464 and Alexa 790 donkey anti-mouse (1:30,000, Life Tchnologies, A11371). Membranes were  
465 washed 4 $\times$ 5 min in TBST, 1 $\times$ 5 min in TBS, and imaged on a LI-COR Odyssey CLx instrument.  
466

467 **Sleep behavior:** One- to four-day-old flies eclosing from cultures entrained in LD cycles (12hr  
468 light/12hr dark) were loaded into glass tubes and assayed for 5-7 days at 25°C in LD cycles  
469 using DAM2 monitors (Trikinetics). Male flies were assayed on food containing cornmeal, agar,  
470 and molasses. Female flies were assayed on food containing 5% sucrose and 2% agar. The  
471 first 36-48 hours of data were discarded, to permit acclimation and recovery from CO<sub>2</sub>  
472 anesthesia, and an integral number of days of data (3-5) were analyzed using custom Matlab  
473 software (Stavropoulos and Young, 2011). Locomotor data was collected in 1 min bins, and a 5  
474 min period of inactivity was used to define sleep (Huber et al., 2004; Shaw et al., 2000); a given  
475 minute was assigned as sleep if the animal was inactive for that minute and the preceding four  
476 minutes. Dead animals were excluded from analysis by a combination of automated filtering and  
477 visual inspection of locomotor traces.

478  
479 **Confocal imaging and analysis:** Imaging was performed as described (Goel and Dickman,  
480 2018). Briefly, samples were imaged using a Nikon A1R Resonant Scanning Confocal

481 microscope equipped with NIS Elements software using a 100x APO 1.4NA or 60x 1.4NA oil  
482 immersion objective. All genotypes were imaged in the same session with identical gain and  
483 offset settings for each channel across genotypes. z-stacks were obtained using identical  
484 settings for all genotypes, with z-axis spacing between 0.15  $\mu\text{m}$  to 0.5  $\mu\text{m}$  within an experiment  
485 and optimized for detection without saturation of the signal. Maximum intensity projections were  
486 used for quantitative image analysis with the NIS Elements software General Analysis toolkit. All  
487 quantifications were performed for Type Ib boutons on muscle 6/7 and muscle 4 of segments A2  
488 and A3. Type Ib boutons were selected at individual NMJs based on DLG intensity.  
489 Measurements were taken from at least ten synapses acquired from at least six different  
490 animals. For all images, fluorescence intensities were quantified by applying intensity thresholds  
491 to eliminate background signal. For analysis of pCaMKII, BRP, and Inc<sup>smFP</sup> intensity levels, a  
492 mask was created around the DLG channel, used to define the postsynaptic density, and only  
493 signals within this mask were quantified. For FK1 and FK2 anti-Ubiquitin staining, mean  
494 intensity was calculated using regions within the DLG mask and subtracting intensities from the  
495 HRP mask (to exclusively assess the postsynaptic area).

496

497 **Statistical Analysis:** All data are presented as mean +/-SEM. Data were compared using  
498 either a one-way ANOVA and tested for significance using a 2-tailed Bonferroni post-hoc test, or  
499 using a Student's t-test (where specified), analyzed using Graphpad Prism or Microsoft Excel  
500 software, and with varying levels of significance assessed as  $p < 0.03$  (\*),  $p < 0.01$  (\*\*),  $p < 0.001$   
501 (\*\*\*),  $p < 0.0001$  (\*\*\*\*), ns=not significant. For statistical analysis of sleep duration, one-way  
502 ANOVA and Tukey-Kramer post hoc tests were used. For all figures, data are quantified as  
503 averages +/-SEM, and absolute values and additional statistical details are presented in  
504 Supplementary Table 3.

505

506 **Data availability:** The data that support the findings of this study are available from DD upon  
507 reasonable request. The authors declare that the data supporting the findings of this study are  
508 available within the paper and its Supplementary Information files.

509

## 510 **AUTHOR CONTRIBUTIONS**

511 KK and DD conceived the project and designed the research. KK, XL, SP, PG, CC, DK, and QL  
512 performed experiments. KK, XL, PG, CC, SP, and QL analyzed data. KK and DD wrote the  
513 manuscript with feedback from QL, SP, and NS.

514

## 515 **ACKNOWLEDGEMENTS**

516 We thank C. Andrew Frank (University of Iowa, USA), Mark Tanouye (University of California,  
517 Berkeley, USA), and Gabrielle Boulianne (University of Toronto, Canada) for sharing fly stocks,  
518 and Martin Müller (University of Zürich, Switzerland) for insightful discussions and comments.

519 We acknowledge the Developmental Studies Hybridoma Bank (Iowa, USA) for antibodies used  
520 in this study and the Bloomington Drosophila Stock Center for fly stocks (NIH P40OD018537).

521 KK was supported in part by a USC Provost Fellowship. QL was supported by an International  
522 Student Research Fellowship from the Howard Hughes Medical Institute (HHMI). This work was  
523 supported by a grant from the Mathers Foundation, Whitehall Foundation grant 2013-05-78,  
524 fellowships from the Alfred P. Sloan and Leon Levy Foundations, a NARSAD Young  
525 Investigator Award from the Brain and Behavior Foundation, the J. Christian Gillin, M.D.

526 Research Award from the Sleep Research Society Foundation, and a Career Scientist Award  
527 from the Irma T. Hirsch/Weill-Caulier Trust to NS, and by a grant from the National Institutes of  
528 Health (NS091546) and fellowships from the Mallinckrodt, Whitehall, and Klingenstein-Simons  
529 Foundations to DD. The authors declare no competing financial interests.

530

## 531 **FIGURE LEGENDS**

532 **Figure 1: Dual forward genetic screens identify 6 genes necessary for PHP induction**  
533 **and/or expression in distinct synaptic compartments. (a and d)** Electrophysiology-based  
534 forward genetic screening strategy and outcomes for the PhTx (a) and *GluRIII* knock down (d)  
535 approaches. **(b and e)** Average EPSP amplitudes of each mutant or RNAi line screened  
536 following PhTx application (b) or *GluRIII* knock down (e). In wild-type controls, inhibition of  
537 glutamate receptors results in reduced mEPSP amplitude, as expected. However, EPSP  
538 amplitude remains similar to baseline values due to a homeostatic increase in presynaptic  
539 neurotransmitter release (quantal content). Highlighted in red are all mutants that showed EPSP  
540 values > two standard deviations below controls. **(c and f)** Determination of pre- and post-  
541 synaptic functions for the positive hits from the screens.

542

543 **Figure 2: *inc* is required in the postsynaptic muscle to drive retrograde PHP signaling.**

544 **(a)** Schematic of the *Drosophila inc* locus, with the region targeted by the guide RNA to  
545 generate *inc<sup>kk3</sup>* and *inc<sup>kk4</sup>* shown. (Bottom) Structure of Inc and the predicted Inc mutant  
546 proteins. **(b)** Anti-Inc immunoblot analysis from whole adult lysates confirms that both *inc<sup>kk3</sup>* and  
547 *inc<sup>kk4</sup>* are protein null alleles. **(c)** Acute expression of PHP requires *inc*. Representative EPSC  
548 and mEPSC traces for wild type (*w<sup>1118</sup>*) and *inc<sup>kk3</sup>* mutants before and after PhTx application.  
549 *inc<sup>kk3</sup>* mutants fail to homeostatically increase presynaptic neurotransmitter release after PhTx  
550 application, resulting in reduced EPSC amplitudes. **(d)** Average mEPSC amplitude and quantal  
551 content values following PhTx application relative to baseline (-PhTx) are shown for the  
552 indicated genotypes. **(e)** Representative NMJ images of GFP expression driven by the *inc*  
553 promoter (*inc-Gal4;UAS-eGFP/+*). Anti-HRP (neuronal membrane marker) and anti-phalloidin  
554 (muscle actin marker) are shown. Inc is expressed in both presynaptic neurons and  
555 postsynaptic muscles. **(f)** Schematic and representative EPSC and mEPSC traces in which  
556 *UAS-smFP-inc* is expressed in motor neurons (presynaptic rescue: *inc<sup>kk3</sup>;Ok371-Gal4/UAS-*  
557 *smFP-inc*) or muscle (postsynaptic rescue: *inc<sup>kk3</sup>; UAS-smFP-inc/+; MHC-Gal4/+*) in *inc* mutant

558 backgrounds following PhTx application. Postsynaptic expression of *inc* fully restores PHP  
559 expression, while PHP fails in the presynaptic rescue condition. **(g)** Average mEPSC and  
560 quantal content values in (f) relative to baseline. Error bars indicate  $\pm$ SEM.

561

562 **Figure 3: *inc* functions downstream of or in parallel to CaMKII but upstream of retrograde**

563 **PHP signaling. (a)** Representative images from wild type and *inc*<sup>kk3</sup> NMJs immunostained with

564 antibodies against the postsynaptic glutamate receptor subunits GluRIIA and GluRIID. No

565 alteration in glutamate receptor levels is observed in *inc* mutants. **(b)** Quantification of average

566 intensity levels of GluRIIA and GluRIID. **(c)** Representative NMJ images of wild type and *inc*

567 mutants immunostained with anti-pCaMKII, -DLG (Discs Large) and -BRP before and after PhTx

568 application. A similar reduction in pCaMKII levels are observed following PhTx application in

569 both wild type and *inc* mutants. In contrast, BRP levels are increased after PhTx application in

570 wild type, but do not change after PhTx application to *inc* mutants, consistent with a lack of

571 presynaptic PHP expression. **(d)** Quantification of average intensity levels of pCaMKII and BRP

572 after PhTx application relative to wild-type values in the indicated genotypes. **(e)** Schematic

573 illustrating *inc* involvement in retrograde PHP signaling pathways. Error bars indicate  $\pm$ SEM.

574

575 **Figure 4: Endogenously tagged Inc rapidly traffics to postsynaptic densities and**

576 **promotes ubiquitination following glutamate receptor perturbation. (a)** Representative

577 NMJ images of endogenously tagged Inc<sup>smFP</sup> before and after PhTx application. NMJs are

578 immunostained with anti-FLAG and the postsynaptic scaffold marker DLG. Areas outlined by

579 dashed-line are shown at higher magnification below. **(b)** Schematic of the Cul3-Inc ubiquitin

580 ligase complex that targets substrates for mono- and poly-ubiquitination. **(c)** Quantification of

581 Inc<sup>smFP</sup> intensity within the postsynaptic density (marked by DLG) following PhTx application

582 relative to baseline (-PhTx). **(d)** Representative NMJ images from wild type and *inc* mutants

583 immunostained with anti-FK2 (mono- and poly-Ubiquitin), anti-FK1 (poly-Ubiquitin only), the

584 postsynaptic density marker DLG, and the presynaptic membrane marker HRP, before and after  
585 PhTx application. At wild-type NMJs, the FK2 signal rapidly increases at postsynaptic densities  
586 (indicated by the signal outside of HRP) after PhTx application, while no change is observed in  
587 the FK1 signal. However, no change in FK2 intensity is observed at baseline or after PhTx  
588 application of *inc* mutant NMJs. Quantification of average FK2 **(e)** and FK1 **(f)** immunointensity  
589 after PhTx application, normalized to wild type levels. Error bars indicate  $\pm$ SEM.

590

591 **Supplementary Figure 1: *inc* mutants generated by CRISPR/Cas9 gene editing exhibit**

592 **normal baseline transmission and the expected defects in sleep behavior. (a)** Schematic

593 of the *Drosophila inc* locus. The deleted region of *inc*<sup>1</sup>, the pBac transposon insertion site of

594 *inc*<sup>2</sup>, and the CRISPR-induced early stop codon in *inc*<sup>kk3</sup> and *inc*<sup>kk4</sup> (\*) are shown. **(b)**

595 Representative electrophysiological traces of EPSC and mEPSC for wild type (*w*<sup>1118</sup>), *inc*<sup>kk3</sup>,

596 *inc*<sup>2</sup>, *inc*<sup>2/inc<sup>Df</sup>, and *inc*<sup>2/inc</sup><sup>1</sup> mutants. While *inc*<sup>2/inc</sup><sup>1</sup> mutants show reduced synaptic</sup>

597 transmission, as reported previously (Li et al., 2017), baseline synaptic transmission is largely

598 normal in the other *inc* alleles. Quantification of average EPSC amplitude **(c)**, mEPSC amplitude

599 **(d)**, mEPSC frequency **(e)**, and quantal content **(f)** values. **(g)** Quantification of average daily

600 sleep in female flies of the indicated genotype. *inc*<sup>1/inc</sup><sup>kk</sup> females show reduced daily sleep,

601 similar to *inc*<sup>1/inc</sup><sup>2</sup> transheterozygotes. **(h)** Expression of UAS-*smFP-inc* driven by *inc-Gal4*

602 restores sleep to wild-type values in *inc*<sup>1</sup> mutants. Error bars indicate  $\pm$ SEM.

603

604 **Supplementary Figure 2: *inc* is required for the chronic expression of PHP.**

605 **(a)** Representative EPSC and mEPSC traces from the indicated genotypes. PHP fails to be

606 expressed in *inc*<sup>kk3</sup> mutants when combined with loss of *GluRIIA* (*inc*<sup>kk3</sup>;*GluRIIA*<sup>SP16</sup>). **(b)**

607 Quantification of mEPSC and quantal content values in the indicated genotypes normalized to

608 baseline conditions (-*GluRIIA*).

609



610 **Supplementary Figure 3: Overexpression and endogenous tagging of *inc* does not**  
611 **significantly impact baseline neurotransmission or PHP expression. (a)** Representative  
612 EPSC and mEPSC traces of wild type, neuronal *inc* overexpression (*OK371-Gal4/UAS-smFP-*  
613 *inc*), and muscle *inc* overexpression (*UAS-smFP-inc/+;MHC-Gal4/+*). Quantification of mEPSC  
614 amplitude **(b)**, EPSC amplitude **(c)**, and quantal content **(d)** values from the indicated  
615 genotypes. **(e)** Representative EPSC and mEPSC traces from wild type and endogenously  
616 tagged *inc<sup>smFP</sup>* before and after PhTx application. Synaptic transmission and PHP function  
617 similarly to wild type *inc<sup>smFP</sup>* larvae. **(f)** Quantification of average mEPSC amplitude and quantal  
618 content values following PhTx application relative to baseline (-PhTx).

619

620 **Supplementary Figure 4: *Cul3* is required postsynaptically for retrograde PHP signaling.**  
621 **(a)** Representative EPSC and mEPSC traces from neuronal *Cul3* knock down (neuronal>*Cul3*  
622 *RNAi: UAS-Cul3 RNAi<sup>11861R-2</sup>/OK371-Gal4*) and muscle *Cul3* knock down (muscle>*Cul3 RNAi:*  
623 *UAS-Cul3 RNAi<sup>11861R-2</sup>/+;MHC-Gal4/+*) before and after PhTx application. muscle>*Cul3 RNAi*  
624 disrupts the expression of PHP, while PHP expression persists in neuronal>*Cul3 RNAi*. **(b)**  
625 Quantification of mEPSC and quantal content values after PhTx application normalized to  
626 baseline values. Error bars indicate  $\pm$ SEM.

627

628 **Supplementary Table 1: List of synaptic genes screened and summarized results.** The  
629 gene identity (noted by CG number), gene name, putative functions, genotype, genetic  
630 perturbation, source, and mEPSP, EPSP, and quantal content values are shown for each  
631 mutant screened.

632

633 **Supplementary Table 2: Genetic screen identified 17 mutants with reduced basal**  
634 **synaptic transmission.** The CG number, gene name, putative functions, genotype,

635 perturbation type, source, and mEPSP, EPSP, and quantal content values are shown for each  
636 mutant identified that exhibited reduced baseline transmission, but robust PHP expression.

637

638 **Supplementary Table 3: Absolute values for normalized data and additional details.** The  
639 figure and panel, genotype, and conditions used are noted (external Ca<sup>2+</sup> concentration as well  
640 as whether PhTx was applied or not). Average values (with standard error values noted in  
641 parentheses) are shown for all data. For electrophysiological experiments, passive membrane  
642 properties (input resistance, leak current), mEPSC, EPSC, quantal content (QC), data samples  
643 (n), and statistical significance tests and values are shown.

644

## 645 REFERENCES

646

647 Ascano, M., Jr., Mukherjee, N., Bandaru, P., Miller, J.B., Nusbaum, J.D., Corcoran, D.L.,  
648 Langlois, C., Munschauer, M., Dewell, S., Hafner, M., *et al.* (2012). FMRP targets distinct mRNA  
649 sequence elements to regulate protein expression. *Nature* *492*, 382-386.

650 Bischof, J., Maeda, R.K., Hediger, M., Karch, F., and Basler, K. (2007). An optimized  
651 transgenesis system for *Drosophila* using germ-line-specific phiC31 integrases. *Proc Natl Acad*  
652 *Sci U S A* *104*, 3312-3317.

653 Bourgeron, T. (2009). A synaptic trek to autism. *Curr Opin Neurobiol* *19*, 231-234.

654 Brown, V., Jin, P., Ceman, S., Darnell, J.C., O'Donnell, W.T., Tenenbaum, S.A., Jin, X., Feng,  
655 Y., Wilkinson, K.D., Keene, J.D., *et al.* (2001). Microarray identification of FMRP-associated  
656 brain mRNAs and altered mRNA translational profiles in fragile X syndrome. *Cell* *107*, 477-487.

657 Bruckner, J.J., Zhan, H., Gratz, S.J., Rao, M., Ukken, F., Zilberg, G., and O'Connor-Giles, K.M.  
658 (2017). Fife organizes synaptic vesicles and calcium channels for high-probability  
659 neurotransmitter release. *J Cell Biol* *216*, 231-246.

660 Brusich, D.J., Spring, A.M., and Frank, C.A. (2015). A single-cross, RNA interference-based  
661 genetic tool for examining the long-term maintenance of homeostatic plasticity. *Front Cell*  
662 *Neurosci* *9*, 107.

663 Burbea, M., Dreier, L., Dittman, J.S., Grunwald, M.E., and Kaplan, J.M. (2002). Ubiquitin and  
664 AP180 regulate the abundance of GLR-1 glutamate receptors at postsynaptic elements in *C.*  
665 *elegans*. *Neuron* *35*, 107-120.

666 Burrone, J., and Murthy, V.N. (2003). Synaptic gain control and homeostasis. *Curr Opin*  
667 *Neurobiol* *13*, 560-567.

- 668 Bushey, D., Tononi, G., and Cirelli, C. (2009). The *Drosophila* fragile X mental retardation gene  
669 regulates sleep need. *J Neurosci* 29, 1948-1961.
- 670 Bushey, D., Tononi, G., and Cirelli, C. (2011). Sleep and synaptic homeostasis: structural  
671 evidence in *Drosophila*. *Science* 332, 1576-1581.
- 672 Chen, H., Polo, S., Di Fiore, P.P., and De Camilli, P.V. (2003). Rapid Ca<sup>2+</sup>-dependent decrease  
673 of protein ubiquitination at synapses. *Proc Natl Acad Sci U S A* 100, 14908-14913.
- 674 Chen, X., and Dickman, D. (2017). Development of a tissue-specific ribosome profiling  
675 approach in *Drosophila* enables genome-wide evaluation of translational adaptations. *PLoS*  
676 *Genet* 13, e1007117.
- 677 Chen, X., Ma, W., Zhang, S., Paluch, J., Guo, W., and Dickman, D.K. (2017). The BLOC-1  
678 Subunit Pallidin Facilitates Activity-Dependent Synaptic Vesicle Recycling. *eNeuro* 4.
- 679 Colledge, M., Snyder, E.M., Crozier, R.A., Soderling, J.A., Jin, Y., Langeberg, L.K., Lu, H., Bear,  
680 M.F., and Scott, J.D. (2003). Ubiquitination regulates PSD-95 degradation and AMPA receptor  
681 surface expression. *Neuron* 40, 595-607.
- 682 Cross-Disorder Group of the Psychiatric Genomics, C. (2013). Identification of risk loci with  
683 shared effects on five major psychiatric disorders: a genome-wide analysis. *Lancet* 381, 1371-  
684 1379.
- 685 Darnell, J.C., Van Driesche, S.J., Zhang, C., Hung, K.Y., Mele, A., Fraser, C.E., Stone, E.F.,  
686 Chen, C., Fak, J.J., Chi, S.W., *et al.* (2011). FMRP stalls ribosomal translocation on mRNAs  
687 linked to synaptic function and autism. *Cell* 146, 247-261.
- 688 Davis, G.W. (2006). Homeostatic control of neural activity: from phenomenology to molecular  
689 design. *Annu Rev Neurosci* 29, 307-323.
- 690 Davis, G.W. (2013). Homeostatic signaling and the stabilization of neural function. *Neuron* 80,  
691 718-728.
- 692 Davis, G.W., and Muller, M. (2015). Homeostatic control of presynaptic neurotransmitter  
693 release. *Annu Rev Physiol* 77, 251-270.
- 694 de Vivo, L., Bellesi, M., Marshall, W., Bushong, E.A., Ellisman, M.H., Tononi, G., and Cirelli, C.  
695 (2017). Ultrastructural evidence for synaptic scaling across the wake/sleep cycle. *Science* 355,  
696 507-510.
- 697 DiAntonio, A., Haghighi, A.P., Portman, S.L., Lee, J.D., Amaranto, A.M., and Goodman, C.S.  
698 (2001). Ubiquitination-dependent mechanisms regulate synaptic growth and function. *Nature*  
699 412, 449-452.
- 700 Dickman, D.K., and Davis, G.W. (2009). The schizophrenia susceptibility gene dysbindin  
701 controls synaptic homeostasis. *Science* 326, 1127-1130.
- 702 Dickman, D.K., Tong, A., and Davis, G.W. (2012). Snapin is critical for presynaptic homeostatic  
703 plasticity. *J Neurosci* 32, 8716-8724.

- 704 Diering, G.H., Nirujogi, R.S., Roth, R.H., Worley, P.F., Pandey, A., and Huganir, R.L. (2017).  
705 Homer1a drives homeostatic scaling-down of excitatory synapses during sleep. *Science* 355,  
706 511-515.
- 707 Dietzl, G., Chen, D., Schnorrer, F., Su, K.C., Barinova, Y., Fellner, M., Gasser, B., Kinsey, K.,  
708 Oettel, S., Scheiblauer, S., *et al.* (2007). A genome-wide transgenic RNAi library for conditional  
709 gene inactivation in *Drosophila*. *Nature* 448, 151-156.
- 710 Ehlers, M.D. (2003). Activity level controls postsynaptic composition and signaling via the  
711 ubiquitin-proteasome system. *Nat Neurosci* 6, 231-242.
- 712 Ferrarelli, F., Huber, R., Peterson, M.J., Massimini, M., Murphy, M., Riedner, B.A., Watson, A.,  
713 Bria, P., and Tononi, G. (2007). Reduced sleep spindle activity in schizophrenia patients. *Am J*  
714 *Psychiatry* 164, 483-492.
- 715 Foot, N., Henshall, T., and Kumar, S. (2017). Ubiquitination and the Regulation of Membrane  
716 Proteins. *Physiol Rev* 97, 253-281.
- 717 Frank, C.A. (2014). Homeostatic plasticity at the *Drosophila* neuromuscular junction.  
718 *Neuropharmacology* 78, 63-74.
- 719 Frank, C.A., Kennedy, M.J., Goold, C.P., Marek, K.W., and Davis, G.W. (2006). Mechanisms  
720 underlying the rapid induction and sustained expression of synaptic homeostasis. *Neuron* 52,  
721 663-677.
- 722 Fujimuro, M., Sawada, H., and Yokosawa, H. (1994). Production and characterization of  
723 monoclonal antibodies specific to multi-ubiquitin chains of polyubiquitinated proteins. *FEBS Lett*  
724 349, 173-180.
- 725 Gilestro, G.F., Tononi, G., and Cirelli, C. (2009). Widespread changes in synaptic markers as a  
726 function of sleep and wakefulness in *Drosophila*. *Science* 324, 109-112.
- 727 Gillespie, J.M., and Hodge, J.J. (2013). CASK regulates CaMKII autophosphorylation in  
728 neuronal growth, calcium signaling, and learning. *Front Mol Neurosci* 6, 27.
- 729 Gilman, S.R., Iossifov, I., Levy, D., Ronemus, M., Wigler, M., and Vitkup, D. (2011). Rare de  
730 novo variants associated with autism implicate a large functional network of genes involved in  
731 formation and function of synapses. *Neuron* 70, 898-907.
- 732 Goel, P., and Dickman, D. (2018). Distinct homeostatic modulations stabilize reduced  
733 postsynaptic receptivity in response to presynaptic DLK signaling. *Nat Commun* 9, 1856.
- 734 Goel, P., Li, X., and Dickman, D. (2017). Disparate Postsynaptic Induction Mechanisms  
735 Ultimately Converge to Drive the Retrograde Enhancement of Presynaptic Efficacy. *Cell Rep*  
736 21, 2339-2347.
- 737 Gratz, S.J., Cummings, A.M., Nguyen, J.N., Hamm, D.C., Donohue, L.K., Harrison, M.M.,  
738 Wildonger, J., and O'Connor-Giles, K.M. (2013a). Genome engineering of *Drosophila* with the  
739 CRISPR RNA-guided Cas9 nuclease. *Genetics* 194, 1029-1035.

- 740 Gratz, S.J., Wildonger, J., Harrison, M.M., and O'Connor-Giles, K.M. (2013b). CRISPR/Cas9-  
741 mediated genome engineering and the promise of designer flies on demand. *Fly (Austin)* 7, 249-  
742 255.
- 743 Haghghi, A.P., McCabe, B.D., Fetter, R.D., Palmer, J.E., Hom, S., and Goodman, C.S. (2003).  
744 Retrograde control of synaptic transmission by postsynaptic CaMKII at the *Drosophila*  
745 neuromuscular junction. *Neuron* 39, 255-267.
- 746 Haglund, K., and Dikic, I. (2005). Ubiquitylation and cell signaling. *EMBO J* 24, 3353-3359.
- 747 Hamilton, A.M., Oh, W.C., Vega-Ramirez, H., Stein, I.S., Hell, J.W., Patrick, G.N., and Zito, K.  
748 (2012). Activity-dependent growth of new dendritic spines is regulated by the proteasome.  
749 *Neuron* 74, 1023-1030.
- 750 Hamilton, A.M., and Zito, K. (2013). Breaking it down: the ubiquitin proteasome system in  
751 neuronal morphogenesis. *Neural Plast* 2013, 196848.
- 752 Han, C., Jan, L.Y., and Jan, Y.N. (2011). Enhancer-driven membrane markers for analysis of  
753 nonautonomous mechanisms reveal neuron-glia interactions in *Drosophila*. *Proceedings of the*  
754 *National Academy of Sciences of the United States of America* 108, 9673-9678.
- 755 Hauswirth, A.G., Ford, K.J., Wang, T., Fetter, R.D., Tong, A., and Davis, G.W. (2018). A  
756 postsynaptic PI3K-c1l dependent signaling controller for presynaptic homeostatic plasticity. *Elife*  
757 7.
- 758 Hengen, K.B., Torrado Pacheco, A., McGregor, J.N., Van Hooser, S.D., and Turrigiano, G.G.  
759 (2016). Neuronal Firing Rate Homeostasis Is Inhibited by Sleep and Promoted by Wake. *Cell*  
760 165, 180-191.
- 761 Henry, F.E. (2011). A fragile balance at synapses: new evidence supporting a role for FMRP in  
762 homeostatic plasticity. *J Neurosci* 31, 6617-6619.
- 763 Heo, S., Diering, G.H., Na, C.H., Nirujogi, R.S., Bachman, J.L., Pandey, A., and Haganir, R.L.  
764 (2018). Identification of long-lived synaptic proteins by proteomic analysis of synaptosome  
765 protein turnover. *Proc Natl Acad Sci U S A* 115, E3827-E3836.
- 766 Herring, B.E., and Nicoll, R.A. (2016). Long-Term Potentiation: From CaMKII to AMPA Receptor  
767 Trafficking. *Annu Rev Physiol* 78, 351-365.
- 768 Hicke, L., and Dunn, R. (2003). Regulation of membrane protein transport by ubiquitin and  
769 ubiquitin-binding proteins. *Annu Rev Cell Dev Biol* 19, 141-172.
- 770 Hodge, J.J., Mullasseril, P., and Griffith, L.C. (2006). Activity-dependent gating of CaMKII  
771 autonomous activity by *Drosophila* CASK. *Neuron* 51, 327-337.
- 772 Huber, R., Hill, S.L., Holladay, C., Biesiadecki, M., Tononi, G., and Cirelli, C. (2004). Sleep  
773 homeostasis in *Drosophila melanogaster*. *Sleep* 27, 628-639.
- 774 Jin, L., Pahuja, K.B., Wickliffe, K.E., Gorur, A., Baumgartel, C., Schekman, R., and Rape, M.  
775 (2012). Ubiquitin-dependent regulation of COPII coat size and function. *Nature* 482, 495-500.

- 776 Jurado, S., Goswami, D., Zhang, Y., Molina, A.J., Sudhof, T.C., and Malenka, R.C. (2013). LTP  
777 requires a unique postsynaptic SNARE fusion machinery. *Neuron* 77, 542-558.
- 778 Karin, M., and Ben-Neriah, Y. (2000). Phosphorylation meets ubiquitination: the control of NF-  
779  $\kappa$ B activity. *Annu Rev Immunol* 18, 621-663.
- 780 Kauwe, G., Tsurudome, K., Penney, J., Mori, M., Gray, L., Calderon, M.R., Elazouzzi, F.,  
781 Chicoine, N., Sonenberg, N., and Haghghi, A.P. (2016). Acute Fasting Regulates Retrograde  
782 Synaptic Enhancement through a 4E-BP-Dependent Mechanism. *Neuron* 92, 1204-1212.
- 783 Kawabe, H., and Brose, N. (2011). The role of ubiquitylation in nerve cell development. *Nat Rev*  
784 *Neurosci* 12, 251-268.
- 785 Kidd, S.A., Lachiewicz, A., Barbouth, D., Blitz, R.K., Delahunty, C., McBrien, D., Visootsak, J.,  
786 and Berry-Kravis, E. (2014). Fragile X syndrome: a review of associated medical problems.  
787 *Pediatrics* 134, 995-1005.
- 788 Kikuma, K., Li, X., Kim, D., Sutter, D., and Dickman, D.K. (2017). Extended Synaptotagmin  
789 Localizes to Presynaptic ER and Promotes Neurotransmission and Synaptic Growth in  
790 *Drosophila*. *Genetics* 207, 993-1006.
- 791 Kiragasi, B., Wondolowski, J., Li, Y., and Dickman, D.K. (2017). A Presynaptic Glutamate  
792 Receptor Subunit Confers Robustness to Neurotransmission and Homeostatic Potentiation. *Cell*  
793 *Rep* 19, 2694-2706.
- 794 Kobayashi, A., Kang, M.I., Okawa, H., Ohtsuji, M., Zenke, Y., Chiba, T., Igarashi, K., and  
795 Yamamoto, M. (2004). Oxidative stress sensor Keap1 functions as an adaptor for Cul3-based  
796 E3 ligase to regulate proteasomal degradation of Nrf2. *Mol Cell Biol* 24, 7130-7139.
- 797 Lee, K.Y., Jewett, K.A., Chung, H.J., and Tsai, N.P. (2018). Loss of Fragile X Protein FMRP  
798 Impairs Homeostatic Synaptic Downscaling through Tumor Suppressor p53 and Ubiquitin E3  
799 Ligase Nedd4-2. *Hum Mol Genet*.
- 800 Li, J., Park, E., Zhong, L.R., and Chen, L. (2018a). Homeostatic synaptic plasticity as a  
801 metaplasticity mechanism - a molecular and cellular perspective. *Curr Opin Neurobiol* 54, 44-53.
- 802 Li, Q., Kellner, D.A., Hatch, H.A.M., Yumita, T., Sanchez, S., Machold, R.P., Frank, C.A., and  
803 Stavropoulos, N. (2017). Conserved properties of *Drosophila* Insomniac link sleep regulation  
804 and synaptic function. *PLoS Genet* 13, e1006815.
- 805 Li, X., Goel, P., Chen, C., Angajala, V., Chen, X., and Dickman, D.K. (2018b). Synapse-specific  
806 and compartmentalized expression of presynaptic homeostatic potentiation. *Elife* 7.
- 807 Li, X., Goel, P., Wondolowski, J., Paluch, J., and Dickman, D. (2018c). A Glutamate Homeostat  
808 Controls the Presynaptic Inhibition of Neurotransmitter Release. *Cell Rep* 23, 1716-1727.
- 809 Lin, A.W., and Man, H.Y. (2013). Ubiquitination of neurotransmitter receptors and postsynaptic  
810 scaffolding proteins. *Neural Plast* 2013, 432057.
- 811 Lu, A., and Pfeffer, S.R. (2014). A CULLINary ride across the secretory pathway: more than just  
812 secretion. *Trends Cell Biol* 24, 389-399.

- 813 Lu, C.S., Hodge, J.J., Mehren, J., Sun, X.X., and Griffith, L.C. (2003). Regulation of the  
814 Ca<sup>2+</sup>/CaM-responsive pool of CaMKII by scaffold-dependent autophosphorylation. *Neuron* 40,  
815 1185-1197.
- 816 Ma, B., Cheng, H., Gao, R., Mu, C., Chen, L., Wu, S., Chen, Q., and Zhu, Y. (2016). Zyxin-  
817 Siah2-Lats2 axis mediates cooperation between Hippo and TGF-beta signalling pathways. *Nat*  
818 *Commun* 7, 11123.
- 819 Mahr, A., and Aberle, H. (2006). The expression pattern of the *Drosophila* vesicular glutamate  
820 transporter: a marker protein for motoneurons and glutamatergic centers in the brain. *Gene*  
821 *Expr Patterns* 6, 299-309.
- 822 Malinow, R. (2003). AMPA receptor trafficking and long-term potentiation. *Philos Trans R Soc*  
823 *Lond B Biol Sci* 358, 707-714.
- 824 Marder, E., and Goaillard, J.M. (2006). Variability, compensation and homeostasis in neuron  
825 and network function. *Nat Rev Neurosci* 7, 563-574.
- 826 Markstein, M., Pitsouli, C., Villalta, C., Celniker, S.E., and Perrimon, N. (2008). Exploiting  
827 position effects and the gypsy retrovirus insulator to engineer precisely expressed transgenes.  
828 *Nat Genet* 40, 476-483.
- 829 McGourty, C.A., Akopian, D., Walsh, C., Gorur, A., Werner, A., Schekman, R., Bautista, D., and  
830 Rape, M. (2016). Regulation of the CUL3 Ubiquitin Ligase by a Calcium-Dependent Co-adaptor.  
831 *Cell* 167, 525-538 e514.
- 832 Miyashiro, K.Y., Beckel-Mitchener, A., Purk, T.P., Becker, K.G., Barret, T., Liu, L., Carbonetto,  
833 S., Weiler, I.J., Greenough, W.T., and Eberwine, J. (2003). RNA cargoes associating with  
834 FMRP reveal deficits in cellular functioning in *Fmr1* null mice. *Neuron* 37, 417-431.
- 835 Muddashetty, R.S., Kelic, S., Gross, C., Xu, M., and Bassell, G.J. (2007). Dysregulated  
836 metabotropic glutamate receptor-dependent translation of AMPA receptor and postsynaptic  
837 density-95 mRNAs at synapses in a mouse model of fragile X syndrome. *J Neurosci* 27, 5338-  
838 5348.
- 839 Muller, M., and Davis, G.W. (2012). Transsynaptic control of presynaptic Ca<sup>2+</sup>(+) influx  
840 achieves homeostatic potentiation of neurotransmitter release. *Curr Biol* 22, 1102-1108.
- 841 Muller, M., Liu, K.S., Sigrist, S.J., and Davis, G.W. (2012). RIM controls homeostatic plasticity  
842 through modulation of the readily-releasable vesicle pool. *J Neurosci* 32, 16574-16585.
- 843 Muller, M., Pym, E.C., Tong, A., and Davis, G.W. (2011). Rab3-GAP controls the progression of  
844 synaptic homeostasis at a late stage of vesicle release. *Neuron* 69, 749-762.
- 845 Newman, Z.L., Hoagland, A., Aghi, K., Worden, K., Levy, S.L., Son, J.H., Lee, L.P., and Isacoff,  
846 E.Y. (2017). Input-Specific Plasticity and Homeostasis at the *Drosophila* Larval Neuromuscular  
847 Junction. *Neuron* 93, 1388-1404 e1310.
- 848 Orr, B.O., Fetter, R.D., and Davis, G.W. (2017). Retrograde semaphorin-plexin signalling drives  
849 homeostatic synaptic plasticity. *Nature* 550, 109-113.

- 850 Penney, J., Tsurudome, K., Liao, E.H., Elazzouzi, F., Livingstone, M., Gonzalez, M., Sonenberg,  
851 N., and Haghighi, A.P. (2012). TOR is required for the retrograde regulation of synaptic  
852 homeostasis at the *Drosophila* neuromuscular junction. *Neuron* *74*, 166-178.
- 853 Penney, J., Tsurudome, K., Liao, E.H., Kauwe, G., Gray, L., Yanagiya, A., M, R.C., Sonenberg,  
854 N., and Haghighi, A.P. (2016). LRRK2 regulates retrograde synaptic compensation at the  
855 *Drosophila* neuromuscular junction. *Nat Commun* *7*, 12188.
- 856 Perez-Otano, I., and Ehlers, M.D. (2005). Homeostatic plasticity and NMDA receptor trafficking.  
857 *Trends Neurosci* *28*, 229-238.
- 858 Perry, S., Han, Y., Das, A., and Dickman, D. (2017). Homeostatic plasticity can be induced and  
859 expressed to restore synaptic strength at neuromuscular junctions undergoing ALS-related  
860 degeneration. *Hum Mol Genet* *26*, 4153-4167.
- 861 Petersen, S.A., Fetter, R.D., Noordermeer, J.N., Goodman, C.S., and DiAntonio, A. (1997).  
862 Genetic analysis of glutamate receptors in *Drosophila* reveals a retrograde signal regulating  
863 presynaptic transmitter release. *Neuron* *19*, 1237-1248.
- 864 Pfeiffenberger, C., and Allada, R. (2012). Cul3 and the BTB adaptor insomniac are key  
865 regulators of sleep homeostasis and a dopamine arousal pathway in *Drosophila*. *PLoS genetics*  
866 *8*, e1003003.
- 867 Pielage, J., Fetter, R.D., and Davis, G.W. (2005). Presynaptic spectrin is essential for synapse  
868 stabilization. *Curr Biol* *15*, 918-928.
- 869 Pozo, K., and Goda, Y. (2010). Unraveling mechanisms of homeostatic synaptic plasticity.  
870 *Neuron* *66*, 337-351.
- 871 Ramocki, M.B., and Zoghbi, H.Y. (2008). Failure of neuronal homeostasis results in common  
872 neuropsychiatric phenotypes. *Nature* *455*, 912-918.
- 873 Sando, R., 3rd, Gounko, N., Pieraut, S., Liao, L., Yates, J., 3rd, and Maximov, A. (2012).  
874 HDAC4 governs a transcriptional program essential for synaptic plasticity and memory. *Cell*  
875 *151*, 821-834.
- 876 Sare, R.M., Harkless, L., Levine, M., Torossian, A., Sheeler, C.A., and Smith, C.B. (2017).  
877 Deficient Sleep in Mouse Models of Fragile X Syndrome. *Front Mol Neurosci* *10*, 280.
- 878 Schuster, C.M., Davis, G.W., Fetter, R.D., and Goodman, C.S. (1996). Genetic dissection of  
879 structural and functional components of synaptic plasticity. II. Fasciclin II controls presynaptic  
880 structural plasticity. *Neuron* *17*, 655-667.
- 881 Schutt, J., Falley, K., Richter, D., Kreienkamp, H.J., and Kindler, S. (2009). Fragile X mental  
882 retardation protein regulates the levels of scaffold proteins and glutamate receptors in  
883 postsynaptic densities. *J Biol Chem* *284*, 25479-25487.
- 884 Schwarz, L.A., Hall, B.J., and Patrick, G.N. (2010). Activity-dependent ubiquitination of GluA1  
885 mediates a distinct AMPA receptor endocytosis and sorting pathway. *J Neurosci* *30*, 16718-  
886 16729.



- 887 Shaw, P.J., Cirelli, C., Greenspan, R.J., and Tononi, G. (2000). Correlates of sleep and waking  
888 in *Drosophila melanogaster*. *Science* 287, 1834-1837.
- 889 Shepherd, J.D., and Huganir, R.L. (2007). The cell biology of synaptic plasticity: AMPA receptor  
890 trafficking. *Annu Rev Cell Dev Biol* 23, 613-643.
- 891 Soden, M.E., and Chen, L. (2010). Fragile X protein FMRP is required for homeostatic plasticity  
892 and regulation of synaptic strength by retinoic acid. *J Neurosci* 30, 16910-16921.
- 893 Soukup, S.F., Vanhauwaert, R., and Verstreken, P. (2018). Parkinson's disease: convergence  
894 on synaptic homeostasis. *EMBO J*.
- 895 Stavropoulos, N., and Young, M.W. (2011). *insomniac* and *Cullin-3* regulate sleep and  
896 wakefulness in *Drosophila*. *Neuron* 72, 964-976.
- 897 Tai, H.C., and Schuman, E.M. (2008). Ubiquitin, the proteasome and protein degradation in  
898 neuronal function and dysfunction. *Nat Rev Neurosci* 9, 826-838.
- 899 Tian, X., and Wu, C. (2013). The role of ubiquitin-mediated pathways in regulating synaptic  
900 development, axonal degeneration and regeneration: insights from fly and worm. *J Physiol* 591,  
901 3133-3143.
- 902 Tononi, G., and Cirelli, C. (2014). Sleep and the price of plasticity: from synaptic and cellular  
903 homeostasis to memory consolidation and integration. *Neuron* 81, 12-34.
- 904 Tsai, N.P., Wilkerson, J.R., Guo, W., Maksimova, M.A., DeMartino, G.N., Cowan, C.W., and  
905 Huber, K.M. (2012). Multiple autism-linked genes mediate synapse elimination via proteasomal  
906 degradation of a synaptic scaffold PSD-95. *Cell* 151, 1581-1594.
- 907 Tsurudome, K., Tsang, K., Liao, E.H., Ball, R., Penney, J., Yang, J.S., Elazzouzi, F., He, T.,  
908 Chishti, A., Lnenicka, G., *et al.* (2010). The *Drosophila* miR-310 cluster negatively regulates  
909 synaptic strength at the neuromuscular junction. *Neuron* 68, 879-893.
- 910 Turrigiano, G. (2012). Homeostatic synaptic plasticity: local and global mechanisms for  
911 stabilizing neuronal function. *Cold Spring Harb Perspect Biol* 4, a005736.
- 912 Turrigiano, G.G. (2008). The self-tuning neuron: synaptic scaling of excitatory synapses. *Cell*  
913 135, 422-435.
- 914 Turrigiano, G.G., and Nelson, S.B. (2004). Homeostatic plasticity in the developing nervous  
915 system. *Nat Rev Neurosci* 5, 97-107.
- 916 Venken, K.J., He, Y., Hoskins, R.A., and Bellen, H.J. (2006). P[acman]: a BAC transgenic  
917 platform for targeted insertion of large DNA fragments in *D. melanogaster*. *Science* 314, 1747-  
918 1751.
- 919 Viswanathan, S., Williams, M.E., Bloss, E.B., Stasevich, T.J., Speer, C.M., Nern, A., Pfeiffer,  
920 B.D., Hooks, B.M., Li, W.P., English, B.P., *et al.* (2015). High-performance probes for light and  
921 electron microscopy. *Nat Methods* 12, 568-576.

- 922 Vyazovskiy, V.V., and Harris, K.D. (2013). Sleep and the single neuron: the role of global slow  
923 oscillations in individual cell rest. *Nat Rev Neurosci* 14, 443-451.
- 924 Wan, H.I., DiAntonio, A., Fetter, R.D., Bergstrom, K., Strauss, R., and Goodman, C.S. (2000).  
925 Highwire regulates synaptic growth in *Drosophila*. *Neuron* 26, 313-329.
- 926 Wang, C.H., Huang, Y.C., Chen, P.Y., Cheng, Y.J., Kao, H.H., Pi, H., and Chien, C.T. (2017).  
927 USP5/Leon deubiquitinase confines postsynaptic growth by maintaining ubiquitin homeostasis  
928 through Ubiquilin. *Elife* 6.
- 929 Wang, T., Hauswirth, A.G., Tong, A., Dickman, D.K., and Davis, G.W. (2014). Endostatin is a  
930 trans-synaptic signal for homeostatic synaptic plasticity. *Neuron* 83, 616-629.
- 931 Wentzel, C., Delvendahl, I., Sydlik, S., Georgiev, O., and Muller, M. (2018). Dysbindin links  
932 presynaptic proteasome function to homeostatic recruitment of low release probability vesicles.  
933 *Nat Commun* 9, 267.
- 934 Weyhersmuller, A., Hallermann, S., Wagner, N., and Eilers, J. (2011). Rapid active zone  
935 remodeling during synaptic plasticity. *J Neurosci* 31, 6041-6052.
- 936 Wondolowski, J., and Dickman, D. (2013). Emerging links between homeostatic synaptic  
937 plasticity and neurological disease. *Front Cell Neurosci* 7, 223.
- 938 Wulff, K., Gatti, S., Wettstein, J.G., and Foster, R.G. (2010). Sleep and circadian rhythm  
939 disruption in psychiatric and neurodegenerative disease. *Nat Rev Neurosci* 11, 589-599.
- 940 Yang, G., Lai, C.S., Cichon, J., Ma, L., Li, W., and Gan, W.B. (2014). Sleep promotes branch-  
941 specific formation of dendritic spines after learning. *Science* 344, 1173-1178.
- 942 Younger, M.A., Muller, M., Tong, A., Pym, E.C., and Davis, G.W. (2013). A presynaptic ENaC  
943 channel drives homeostatic plasticity. *Neuron* 79, 1183-1196.
- 944 Zhang, Z., Marro, S.G., Zhang, Y., Arendt, K.L., Patzke, C., Zhou, B., Fair, T., Yang, N., Sudhof,  
945 T.C., Wernig, M., *et al.* (2018). The fragile X mutation impairs homeostatic plasticity in human  
946 neurons by blocking synaptic retinoic acid signaling. *Sci Transl Med* 10.
- 947

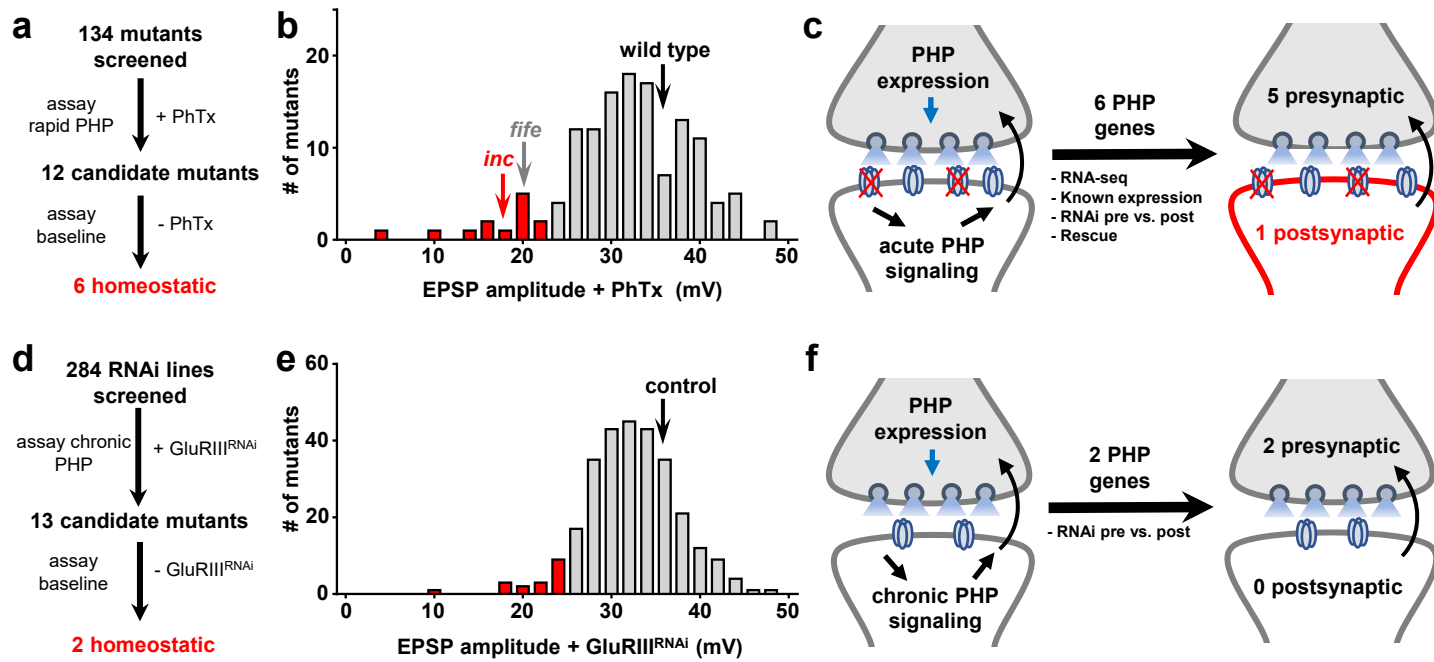

**Figure 1: Dual forward genetic screens identify 6 genes necessary for PHP induction and/or expression in distinct synaptic compartments. (a and d)** Electrophysiology-based forward genetic screening strategy and outcomes for the PhTx (a) and *GluRIII* knock down (d) approaches. **(b and e)** Average EPSP amplitudes of each mutant or RNAi line screened following PhTx application (b) or *GluRIII* knock down (e). In wild-type controls, inhibition of glutamate receptors results in reduced mEPSP amplitude, as expected. However, EPSP amplitude remains similar to baseline values due to a homeostatic increase in presynaptic neurotransmitter release (quantal content). Highlighted in red are all mutants that showed EPSP values > two standard deviations below controls. **(c and f)** Determination of pre- and post-synaptic functions for the positive hits from the screens.

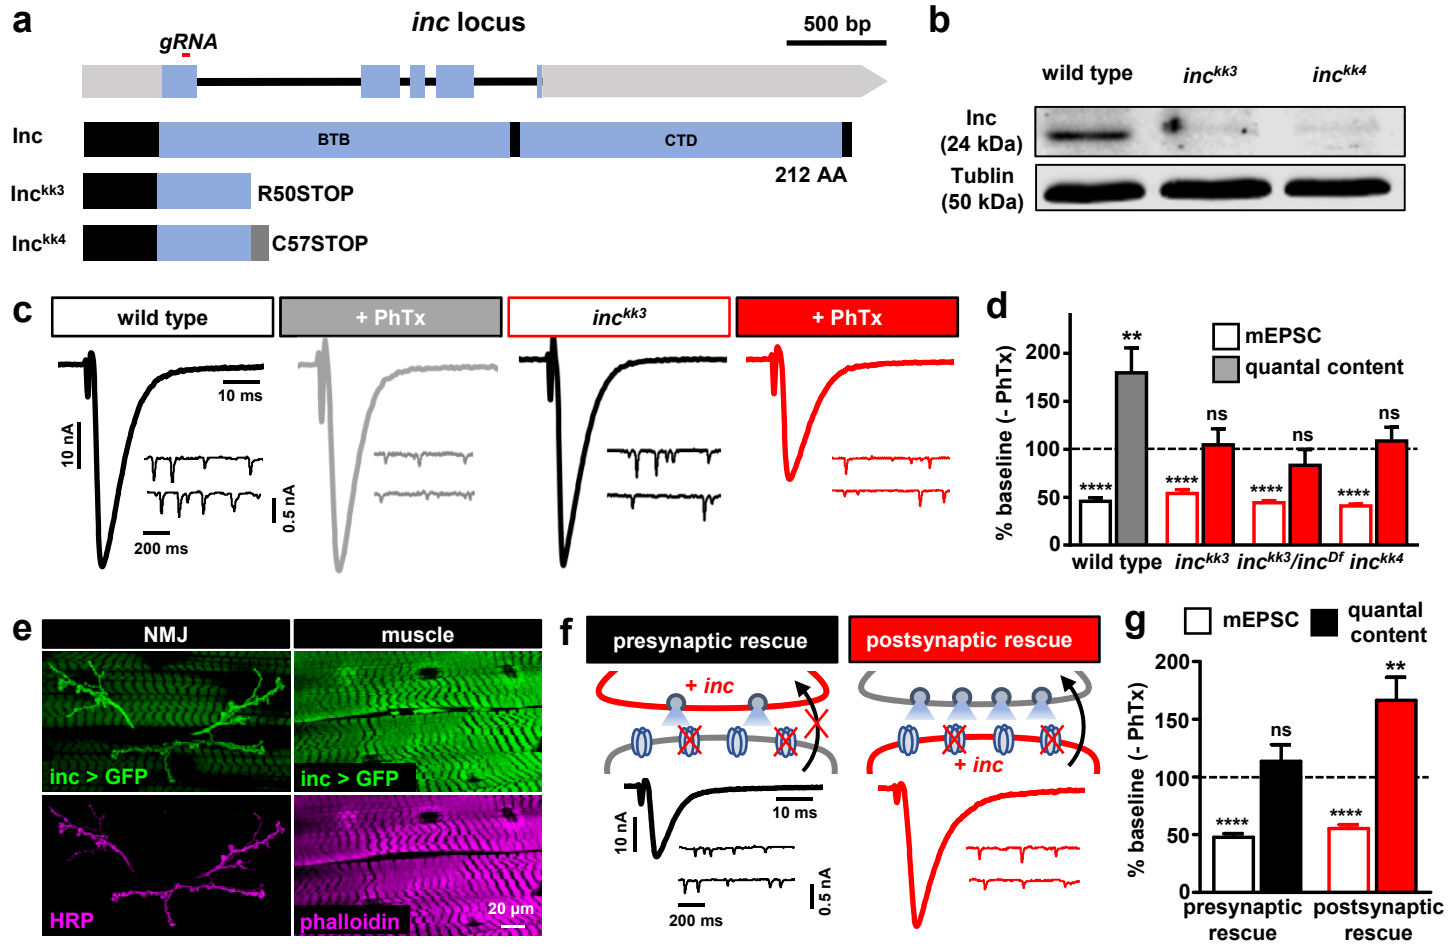

**Figure 2: *inc* is required in the postsynaptic muscle to drive retrograde PHP signaling.** (a) Schematic of the *Drosophila inc* locus, with the region targeted by the guide RNA to generate *inc<sup>kk3</sup>* and *inc<sup>kk4</sup>* shown. (Bottom) Structure of Inc and the predicted Inc mutant proteins. (b) Anti-Inc immunoblot analysis from whole adult lysates confirms that both *inc<sup>kk3</sup>* and *inc<sup>kk4</sup>* are protein null alleles. (c) Acute expression of PHP requires *inc*. Representative EPSC and mEPSC traces for wild type (*w<sup>1118</sup>*) and *inc<sup>kk3</sup>* mutants before and after PhTx application. *inc<sup>kk3</sup>* mutants fail to homeostatically increase presynaptic neurotransmitter release after PhTx application, resulting in reduced EPSC amplitudes. (d) Average mEPSC amplitude and quantal content values following PhTx application relative to baseline (-PhTx) are shown for the indicated genotypes. (e) Representative NMJ images of GFP expression driven by the *inc* promoter (*inc-Gal4;UAS-eGFP/+*). Anti-HRP (neuronal membrane marker) and anti-phalloidin (muscle actin marker) are shown. Inc is expressed in both presynaptic neurons and postsynaptic muscles. (f) Schematic and representative EPSC and mEPSC traces in which *UAS-smFP-inc* is expressed in motor neurons (presynaptic rescue: *inc<sup>kk3</sup>;Ok371-Gal4/UAS-smFP-inc*) or muscle (postsynaptic rescue: *inc<sup>kk3</sup>; UAS-smFP-inc/+; MHC-Gal4/+*) in *inc* mutant backgrounds following PhTx application. Postsynaptic expression of *inc* fully restores PHP expression, while PHP fails in the presynaptic rescue condition. (g) Average mEPSC and quantal content values in (f) relative to baseline. Error bars indicate  $\pm$ SEM.

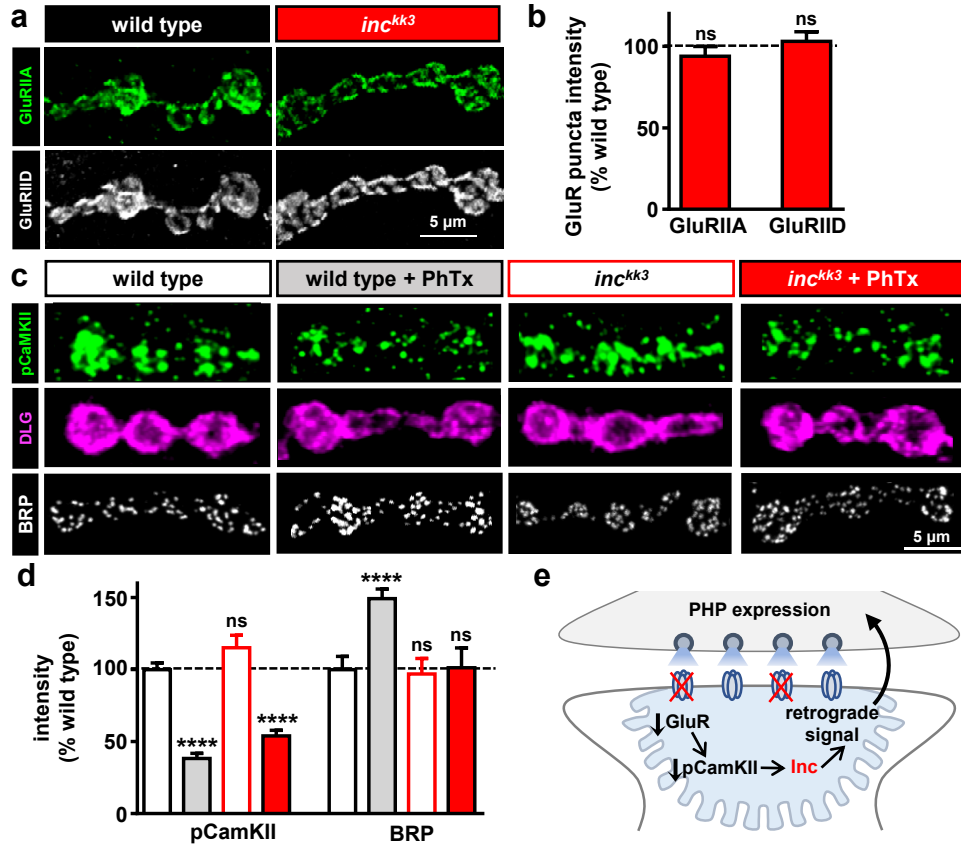

**Figure 3: *inc* functions downstream of or in parallel to CaMKII but upstream of retrograde PHP signaling.** (a) Representative images from wild type and *inc<sup>kk3</sup>* NMJs immunostained with antibodies against the postsynaptic glutamate receptor subunits GluRIIA and GluRIID. No alteration in glutamate receptor levels is observed in *inc* mutants. (b) Quantification of average intensity levels of GluRIIA and GluRIID. (c) Representative NMJ images of wild type and *inc* mutants immunostained with anti-pCaMKII, -DLG (Discs Large) and -BRP before and after PhTx application. A similar reduction in pCaMKII levels are observed following PhTx application in both wild type and *inc* mutants. In contrast, BRP levels are increased after PhTx application in wild type, but do not change after PhTx application to *inc* mutants, consistent with a lack of presynaptic PHP expression. (d) Quantification of average intensity levels of pCaMKII and BRP after PhTx application relative to wild-type values in the indicated genotypes. (e) Schematic illustrating *inc* involvement in retrograde PHP signaling pathways. Error bars indicate  $\pm$ SEM.



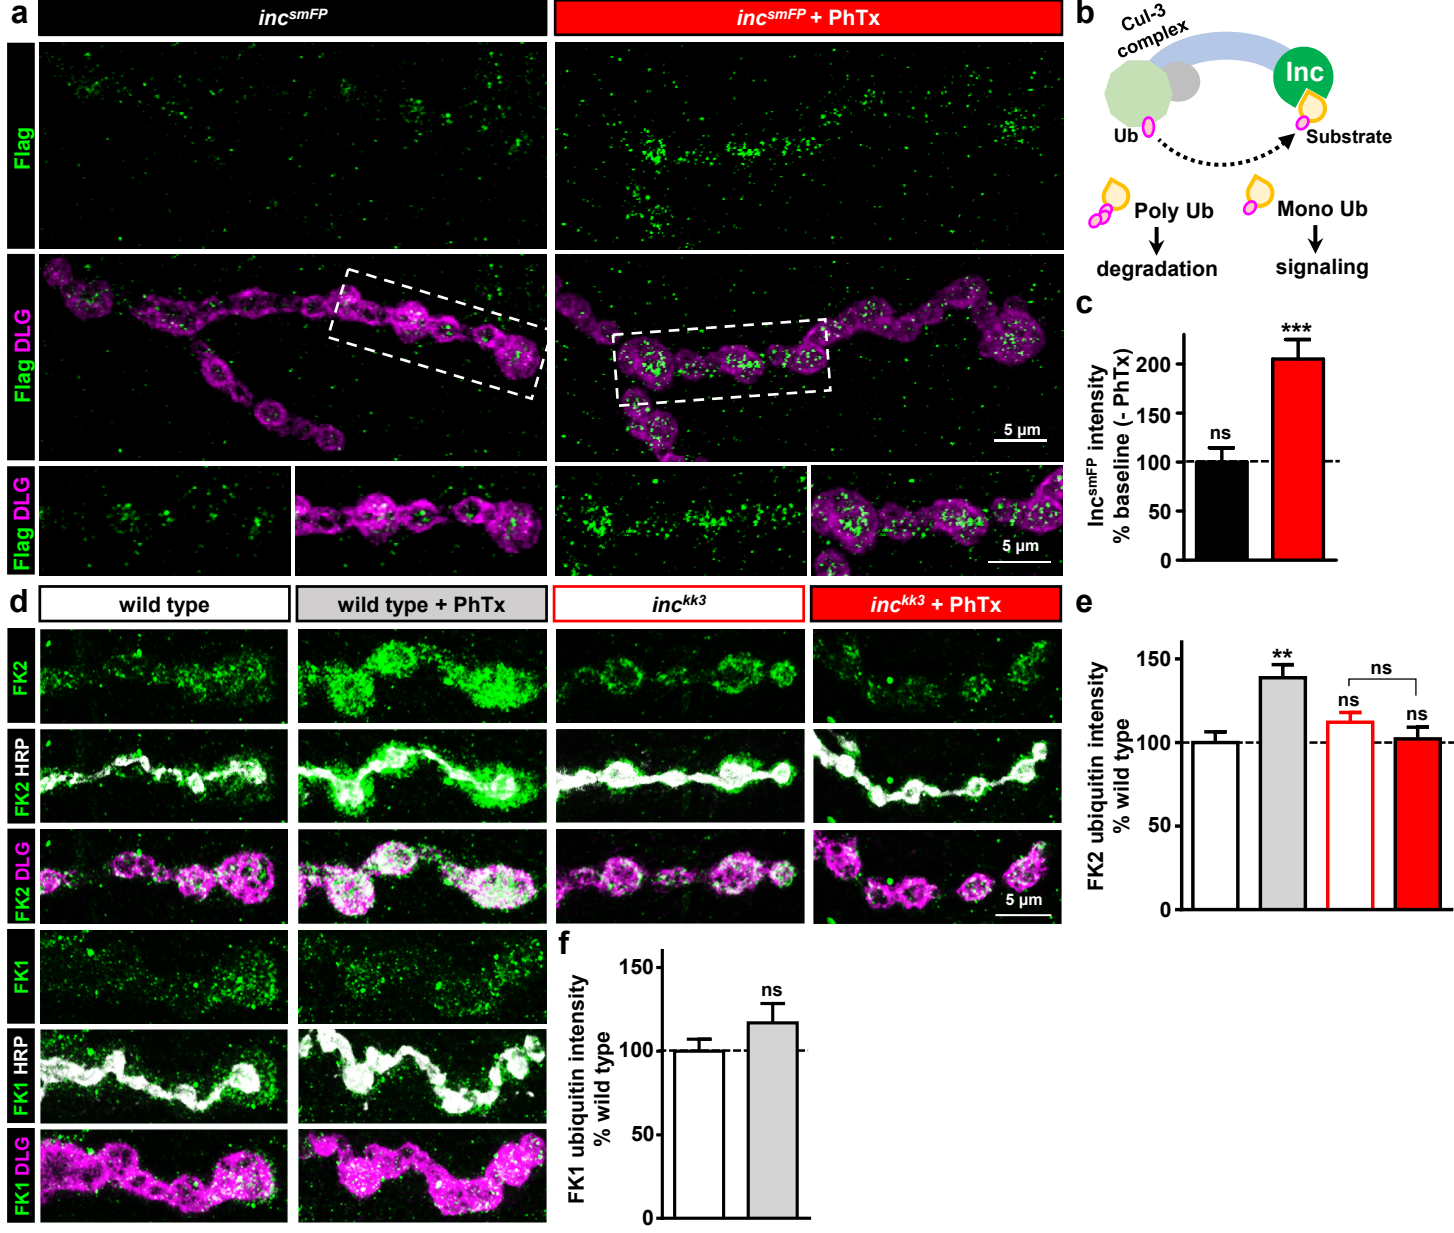

**Figure 4: Endogenously tagged Inc rapidly traffics to postsynaptic densities and promotes ubiquitination following glutamate receptor perturbation. (a)** Representative NMJ images of endogenously tagged Inc<sup>smFP</sup> before and after PhTx application. NMJs are immunostained with anti-FLAG and the postsynaptic scaffold marker DLG. Areas outlined by dashed-line are shown at higher magnification below. **(b)** Schematic of the Cul3-Inc ubiquitin ligase complex that targets substrates for mono- and poly-ubiquitination. **(c)** Quantification of Inc<sup>smFP</sup> intensity within the postsynaptic density (marked by DLG) following PhTx application relative to baseline (-PhTx). **(d)** Representative NMJ images from wild type and *inc* mutants immunostained with anti-FK2 (mono- and poly-Ubiquitin), anti-FK1 (poly-Ubiquitin only), the postsynaptic density marker DLG, and the presynaptic membrane marker HRP, before and after PhTx application. At wild-type NMJs, the FK2 signal rapidly increases at postsynaptic densities (indicated by the signal outside of HRP) after PhTx application, while no change is observed in the FK1 signal. However, no change in FK2 intensity is observed at baseline or after PhTx application of *inc* mutant NMJs. Quantification of average FK2 **(e)** and FK1 **(f)** immunointensity after PhTx application, normalized to wild type levels. Error bars indicate  $\pm$ SEM.
